# Supplementary material
Source: PubMed Central journal article supplement (PMC3956059)

## Supporting Information

# **Silver-Promoted Benzannulations of Siloxy Alkynes with Pyridinium and Isoquinolinium Salts**

Jaime R. Cabrera-Pardo, David I. Chai, and Sergey A. Kozmin\*

Department of Chemistry, University of Chicago, Chicago, IL 60637, USA

email: [skozmin@uchicago.edu](mailto:skozmin@uchicago.edu)

**General Information.** Hexanes (ACS grade) and triethylamine (ACS grade) were purchased from Fisher Scientific and used without further purification. Dichloromethane was distilled over calcium hydride under a positive pressure of nitrogen. Unless otherwise noted, all reactions were performed under an inert atmosphere of nitrogen in flame-dried vials equipped with a stirbar and a cap with PTFE insert. Other commercially available reagents were obtained from Sigma-Aldrich and TCI America and were used without further purification unless otherwise noted. Solution-phase reactions were monitored by thin layer chromatography (TLC) using Whatman precoated silica gel plates. Column chromatography was performed by either CombiFlash<sup>®</sup> using Silcycle silica gel column (24g, 230-400 mesh) or flash column chromatography using Siliaflash<sup>®</sup> F60. <sup>1</sup>H and <sup>13</sup>C NMR spectra were recorded on a Bruker DMX-500 instrument and chemical shifts are reported in ppm using residual solvent peaks as internal standards. High-resolution mass spectra were recorded with a Waters Q-TOF Ultima tandem quadrupole/time-of-flight instrument.

**General Procedure for the formation of *N*-Alkyl-pyridinium or *N*-Alkyl-isoquinolinium salts.**

A 100 mL round-bottomed flame-dried flask containing *N*-Alkyl-pyridine or *N*-Alkyl-isoquinoline (5 mmol) in dichloromethane (0.2 mL) was treated with alkyl iodide (2 eq.). The mixture was stirred at reflux temperature for 12 h. The solvent was removed under reduced pressure and dried under vacuum until solid formed. The mixture was re-dissolved in ethanol (5 - 10 mL), and then diethyl ether (10 – 20 mL) was added. The mixture was cool down to 0 °C and the resulting precipitate collected by filtration.

**Pyridinium iodide 5** was obtained according to general procedure above (316 mg, 20% yield).

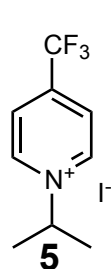

$^1\text{H NMR}$  ( $\text{CD}_3\text{CN}$ ):  $\delta$  9.35 (2H, d,  $J = 5.0$  Hz), 8.43 (2H, br m), 5.25 (1H, septet,  $J = 6.5$  Hz), 1.74 (6H, d,  $J = 6.5$  Hz).  $^{13}\text{C NMR}$  ( $\text{CD}_3\text{CN}$ ):  $\delta$  144.9(t), 125.0 (q), 122.0, 119.8, 66.1(t), 21.7. HRMS-ESI calculated for  $\text{C}_9\text{H}_{11}\text{NF}_3$  [ $\text{M-I}^+$ ] 190.0844, found 190.0843.

**Pyridinium iodide 7** was obtained according to general procedure above (1.5 g, 92% yield).

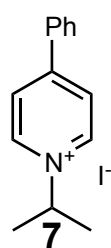

$^1\text{H NMR}$  ( $\text{CD}_3\text{CN}$ ):  $\delta$  9.00 (2H, d,  $J = 7.0$  Hz), 8.35 (2H, d,  $J = 7.0$  Hz), 7.90 (2H, m), 7.67 (3H, m), 5.08 (1H, septet,  $J = 6.5$  Hz), 1.71 (6H, d,  $J = 6.5$  Hz).  $^{13}\text{C NMR}$  ( $\text{CD}_3\text{CN}$ ):  $\delta$  155.9, 142.3, 133.4, 131.7, 129.3, 127.7, 124.8, 63.7, 21.7. HRMS-ESI calculated for  $\text{C}_{14}\text{H}_{16}\text{N}$  [ $\text{M-I}^+$ ] 198.1283, found 198.1282.

**Pyridinium iodide 9** was obtained according to general procedure above (0.9 g, 72% yield).

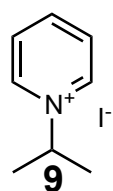

$^1\text{H}$  NMR ( $\text{CD}_3\text{CN}$ )  $\delta$  9.06 (2H, d,  $J = 6.0$  Hz), 8.58 (1H, tt,  $J = 8.0, 1.5$  Hz), 8.12 (2H, t,  $J = 7.0$  Hz), 5.11 (1H, septet,  $J = 7.0$  Hz), 1.70 (6H, d,  $J = 7.0$  Hz).  $^{13}\text{C}$  NMR ( $\text{CD}_3\text{CN}$ )  $\delta$  145.3, 142.4 (t), 127.9, 64.5, 21.7. HRMS-ESI calculated for  $\text{C}_8\text{H}_{12}\text{N}$   $[\text{M}-\text{I}^+]$

122.0964, found 122.0959.

**Pyridinium iodide 11** was obtained according to general procedure above (0.85 g, 65% yield).

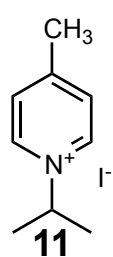

$^1\text{H}$  NMR ( $\text{CD}_3\text{CN}$ )  $\delta$  8.88 (2H, d,  $J = 5.5$  Hz), 7.92 (2H, d,  $J = 5.0$  Hz), 5.03 (1H, septet,  $J = 7.0$  Hz), 2.66 (3H, s), 1.66 (6H, d,  $J = 6.0$  Hz).  $^{13}\text{C}$  NMR ( $\text{CD}_3\text{CN}$ )  $\delta$  159.7, 142.0, 117.5, 63.9, 22.4, 21.4. HRMS-ESI calculated for  $\text{C}_9\text{H}_{14}\text{N}$   $[\text{M}-\text{I}^+]$  136.1126, found 136.1126.

**Pyridinium iodide 13** was obtained according to general procedure above (0.38 g, 30% yield).

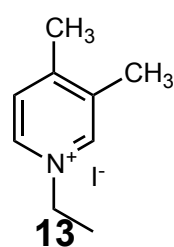

$^1\text{H}$  NMR ( $\text{CDCl}_3$ )  $\delta$  9.29 (1H, s), 9.05 (1H, d,  $J = 6.0$  Hz), 7.79 (1H, d,  $J = 6.5$  Hz), 4.85 (2H, q,  $J = 7.5$  Hz), 2.51 (3H, s), 2.49 (3H, s), 1.65 (3H, t,  $J = 7.5$  Hz).  $^{13}\text{C}$  NMR ( $\text{CDCl}_3$ )  $\delta$  157.6, 142.8, 141.2, 138.3, 128.5, 56.1, 20.3, 17.1, 16.9. HRMS-ES $^+$  calculated for  $\text{C}_9\text{H}_{14}\text{N}$   $[\text{M}-\text{I}]^+$  136.1126, found  $[\text{M}-\text{I}]^+$  136.1126.

**Pyridinium iodide 15** was obtained according to general procedure above (1.2 g, 86% yield).

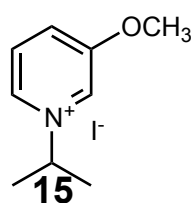

$^1\text{H NMR}$  ( $\text{CDCl}_3$ )  $\delta$  9.11 (1H, d,  $J = 1.0$  Hz), 8.96 (1H, d,  $J = 6.0$  Hz) 8.08 (1H, dd,  $J = 8.5, 6.0$  Hz), 8.02 (1H, ddd,  $J = 9.0, 2.5, 1.0$  Hz), 5.60 (1H, m,  $J = 7.0$  Hz), 4.14 (3H, s), 1.74 (6H, d,  $J = 6.5$  Hz).  $^{13}\text{C NMR}$  ( $\text{CDCl}_3$ )  $\delta$  158.5, 134.8, 131.3, 129.9, 129.1, 65.2, 58.9, 23.3. HRMS-ES $^+$  calculated for  $\text{C}_9\text{H}_{14}\text{NO}$   $[\text{M-I}]^+$  152.1075, found  $[\text{M-I}]^+$  152.1076.

**Isoquinolinium iodide 17** was obtained according to general procedure above (1.05 g, 62% yield).

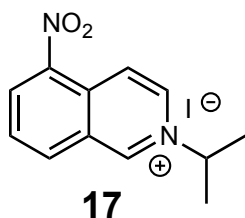

$^1\text{H NMR}$  ( $\text{CD}_3\text{CN}$ )  $\delta$  10.32 (1H, s), 9.05 (1H, d,  $J = 7.0$  Hz), 8.98 (2H, t,  $J = 9.0$  Hz), 8.82 (1H, dd,  $J = 7.0, 1.5$  Hz), 8.19 (1H, t,  $J = 8.0$  Hz), 5.23 (1H, m,  $J = 7.0$  Hz), 1.79 (6H, d,  $J = 7.0$  Hz).  $^{13}\text{C NMR}$  ( $\text{CD}_3\text{CN}$ )  $\delta$  149.7, 138.4, 136.5, 135.4, 131.5, 131.1, 129.8, 123.5, 118.9, 66.3, 22.9. HRMS-ES $^+$  calculated for  $\text{C}_{12}\text{H}_{13}\text{N}_2\text{O}_2$   $[\text{M-I}]^+$  217.0977, found  $[\text{M-I}]^+$  217.0981.

**Isoquinolinium iodide 19** was obtained according to general procedure above (0.793 g, 53% yield).

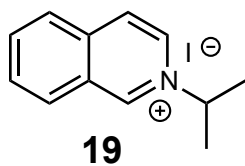

$^1\text{H NMR}$  ( $\text{CD}_3\text{CN}$ )  $\delta$  10.00 (1H, s), 8.65 (1H, d,  $J = 7.0$  Hz), 8.58 (1H, d,  $J = 8.5$  Hz), 8.49 (1H, d,  $J = 7.0$  Hz), 5.18 (1H, septet,  $J = 6.5$  Hz), 1.79 (6H, d,  $J = 7.0$  Hz).  $^{13}\text{C NMR}$  ( $\text{CD}_3\text{CN}$ )  $\delta$  147.8, 137.8, 137.0, 132.7 (br m), 131.4, 130.4, 128.0, 127.2, 126.5, 64.8, 22.2. HRMS-ESI calculated for  $\text{C}_{12}\text{H}_{14}\text{N}$   $[\text{M-I}]^+$  172.1126, found 172.1123.

**Isoquinolinium iodide 21** was obtained according to general procedure above (1.3 g, 69%

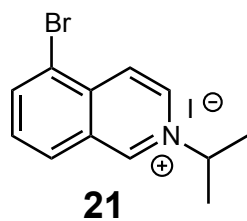

yield).  $^1\text{H}$  NMR ( $\text{CD}_3\text{CN}$ )  $\delta$  10.19 (1H, s), 8.78 (1H, dd,  $J = 7.0, 1.5$  Hz), 8.67 – 8.62 (2H, m), 8.50 (1H, dd,  $J = 8.0, 1.0$  Hz), 7.95 (1H, t,  $J = 8.0$  Hz), 5.26 (1H, septet,  $J = 6.5$  Hz), 1.80 (6H, d,  $J = 7.0$  Hz).  $^{13}\text{C}$  NMR ( $\text{CD}_3\text{CN}$ )  $\delta$  148.4, 140.5, 136.8, 134.4, 132.1, 130.6, 129.3, 125.6, 121.1, 65.2, 22.2.

HRMS-ESI calculated for  $\text{C}_{12}\text{H}_{13}\text{NBr}$  [ $\text{M-I}^+$ ] 250.0231, found 250.0233.

**Isoquinolinium iodide 23** was obtained according to general procedure above (1.32 g, 65%

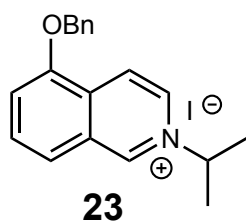

yield).  $^1\text{H}$  NMR ( $\text{CD}_3\text{CN}$ )  $\delta$  10.00 (1H, br s), 8.63 (2H, s), 8.13 (1H, d,  $J = 8.0$  Hz), 7.97 (1H, t,  $J = 8.0$  Hz), 7.70 (1H, d,  $J = 7.5$  Hz), 7.97 (1H, t,  $J = 8.0$  Hz), 7.70 (1H, d,  $J = 7.5$  Hz), 7.61 (2H, d,  $J = 8.0$  Hz), 7.48 (2H, t,  $J = 7.5$  Hz), 7.43 (1H, m), 6.44 (2H, s), 5.19 (1H, m), 1.79 (6H, d,  $J = 7.0$  Hz).  $^{13}\text{C}$

NMR ( $\text{CD}_3\text{CN}$ )  $\delta$  153.3, 147.2, 136.0, 132.4, 132.3, 130.1, 129.0, 128.7, 128.4, 127.9, 121.7, 121.3, 115.9, 70.9, 64.9, 22.2. HRMS-ESI calculated for  $\text{C}_{19}\text{H}_{20}\text{NO}$  [ $\text{M-I}^+$ ] 278.1545 found 278.1548.

**Phenol 4** was obtained according to general benzannulation procedure (27.6 mg, 70% yield).

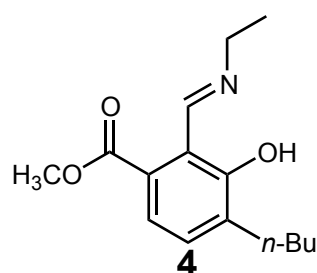

$^1\text{H NMR}$  ( $\text{CDCl}_3$ )  $\delta$  9.27 (1H, s), 7.24 (1H, d,  $J = 8.0$  Hz), 7.12 (1H, d,  $J = 8.0$  Hz), 3.82 (3H, s), 3.60 (2H, q,  $J = 7.0$  Hz), 2.62 (2H, t,  $J = 7.5$  Hz), 1.55 (2H, quintet,  $J = 7.5$  Hz), 1.32 (2H, sextet,  $J = 7.5$  Hz), 1.28 (3H, t,  $J = 7.5$  Hz), 0.87 (3H, t,  $J = 7.0$  Hz).  $^{13}\text{C NMR}$  ( $\text{CDCl}_3$ )  $\delta$  167.5,

164.0, 137.2, 131.3, 128.3, 120.1, 115.2, 52.3, 52.1, 31.2, 29.9, 22.7, 16.1, 14.0. HRMS-EI calculated for  $\text{C}_{15}\text{H}_{21}\text{NO}_3$  [ $\text{M}^+$ ] 263.1521 found 263.1528.

**Phenol 6** was obtained according to general benzannulation procedure (36 mg, 85% yield).

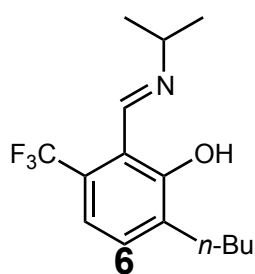

$^1\text{H NMR}$  ( $\text{CDCl}_3$ )  $\delta$  8.62 (1H, s), 7.14 (1H, d,  $J = 8.0$  Hz), 7.00 (1H, d,  $J = 7.5$  Hz), 3.57 (2H, septet,  $J = 6.0$  Hz), 2.63 (2H, t,  $J = 8.0$  Hz), 1.55 (2H, quintet,  $J = 7.5$  Hz), 1.33 (2H, sextet,  $J = 8.0$  Hz), 1.27 (6H, d,  $J = 6.0$  Hz), 0.88 (3H, t,  $J = 6.0$  Hz).  $^{13}\text{C NMR}$  ( $\text{CDCl}_3$ )  $\delta$  162.9, 159.6, 136.5, 135.5, 131.1, 130.4, 127.2, 127.0, 125.3, 123.1, 115.2, 113.0, 59.6, 31.2, 29.7,

24.1, 22.7, 14.0. HRMS-EI calculated for  $\text{C}_{15}\text{H}_{20}\text{F}_3\text{NO}$  [ $\text{M}^+$ ] 287.1497 found 287.1488.

**Phenol 8** was obtained according to general benzannulation procedure (37.7 mg, 85% yield).

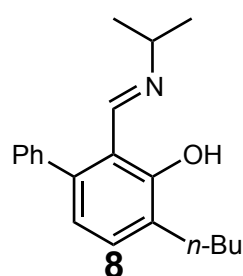

$^1\text{H NMR}$  ( $\text{CDCl}_3$ )  $\delta$  8.27 (1H, s), 7.36 – 7.28 (3H, m), 7.24 (2H, m), 7.12 (1H, d,  $J = 7.5$  Hz), 6.60 (1H, d,  $J = 7.5$  Hz), 3.30 (1H, septet,  $J = 6.5$  Hz), 2.63 (2H, t,  $J = 8.0$  Hz), 1.59 (2H, quintet,  $J = 8.0$  Hz), 1.37 (2H, sextet,  $J = 7.5$  Hz), 1.16 (6H, d,  $J = 6.0$  Hz), 0.90 (3H, t,  $J = 7.0$  Hz).  $^{13}\text{C NMR}$  ( $\text{CDCl}_3$ )

$\delta$  161.6, 142.1, 139.8, 131.9, 130.2, 129.9, 128.1, 127.2, 119.3, 115.0, 59.5, 31.7, 29.5, 24.2, 22.8, 14.0. HRMS-EI calculated for  $\text{C}_{20}\text{H}_{25}\text{NO}$  [ $\text{M}^+$ ] 295.1936 found 295.1939.

**Phenol 10** was obtained according to general benzannulation procedure (23 mg, 70% yield).

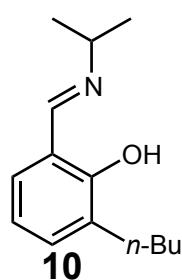

$^1\text{H NMR}$  ( $\text{CDCl}_3$ )  $\delta$  8.28 (1H, s), 7.11 (1H, d,  $J = 7.5$  Hz), 7.04 (1H, d,  $J = 8.0$  Hz), 6.74 (1H, t,  $J = 7.5$  Hz), 3.50 (1H, septet,  $J = 6.5$  Hz), 2.61 (2H, t,  $J = 8.0$  Hz), 1.55 (2H, quintet,  $J = 8.0$  Hz), 1.33 (2H, sextet,  $J = 7.5$  Hz), 1.23 (6H, d,  $J = 6.0$  Hz), 0.88 (3H, t,  $J = 7.0$  Hz).  $^{13}\text{C NMR}$  ( $\text{CDCl}_3$ )  $\delta$  162.4, 162.3, 132.5, 130.7, 128.9, 118.1, 110.0, 59.7, 31.8, 29.4, 24.1, 22.7, 14.0. HRMS-EI calculated for

$\text{C}_{14}\text{H}_{21}\text{NO}$  [ $\text{M}^+$ ] 219.1623 found 219.1620.

**Phenol 12** was obtained according to general benzannulation procedure (23.1 mg, 66% yield).

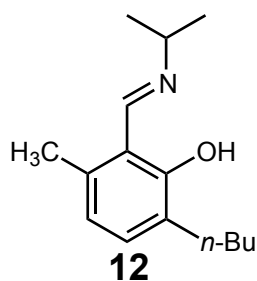

$^1\text{H NMR}$  ( $\text{CDCl}_3$ )  $\delta$  8.61 (1H, s), 6.97 (1H, d,  $J = 7.5$  Hz), 6.47 (1H, d,  $J = 7.5$  Hz), 3.47 (1H, septet,  $J = 6.5$  Hz), 2.55 (2H, t,  $J = 8.5$  Hz), 2.34 (3H, s), 1.53 (2H, quintet,  $J = 7.5$  Hz), 1.33 (2H, sextet,  $J = 8.0$  Hz), 1.23 (6H, d,  $J = 6.5$  Hz), 0.87 (3H, t,  $J = 7.0$  Hz).  $^{13}\text{C NMR}$  ( $\text{CDCl}_3$ )  $\delta$  160.8, 159.9, 135.8, 132.3, 129.0, 119.5, 115.8, 60.1, 31.8, 29.3, 24.3, 22.7, 18.7, 14.0.

HRMS-EI calculated for  $\text{C}_{15}\text{H}_{23}\text{NO}$  [ $\text{M}^+$ ] 233.1780 found 233.1772.

**Phenol 14** was obtained according to general benzannulation procedure (19.1 mg, 55% yield).

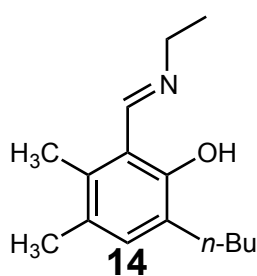

$^1\text{H NMR}$  ( $\text{CDCl}_3$ )  $\delta$  8.78 (1H, s), 6.97 (1H, s), 3.63 (2H, q,  $J = 7.5$  Hz), 2.59 (2H, t,  $J = 8.0$  Hz), 2.32 (3H, s), 2.20 (3H, s), 1.59 (2H, tt,  $J = 9.5, 7.5$  Hz), 1.38 (2H, m), 1.32 (3H, t,  $J = 7.0$  Hz), 0.93 (3H, t,  $J = 7.5$  Hz).  $^{13}\text{C NMR}$  ( $\text{CDCl}_3$ )  $\delta$  162.5, 158.9, 139.7, 134.7, 127.9, 125.0, 115.8, 53.9, 32.0,

29.3, 22.8, 19.7, 16.4, 14.3, 14.0. HRMS-ES $^+$  calculated for  $\text{C}_{15}\text{H}_{25}\text{NO}$  [ $\text{M}+\text{H}$ ] $^+$  234.1858, found [ $\text{M}+\text{H}$ ] $^+$  234.1861.



**Phenol 16** was obtained according to general benzannulation procedure (22.8 mg, 61% yield).

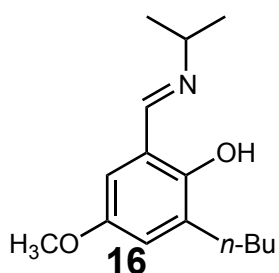

$^1\text{H NMR}$  ( $\text{CDCl}_3$ )  $\delta$  8.27 (1H, s), 6.78 (1H, d,  $J = 3.0$  Hz), 6.57 (1H, d,  $J = 3.0$  Hz), 3.74 (3H, s), 3.51 (1H, m,  $J = 6.5$  Hz), 2.62 (2H, t,  $J = 7.5$  Hz), 1.59 (2H, tt,  $J = 8.0, 2.0$  Hz). 1.38 (2H, m,  $J = 7.5$  Hz), 1.26 (6H, d,  $J = 6.5$  Hz), 0.92 (3H, t,  $J = 7.5$  Hz).  $^{13}\text{C NMR}$  ( $\text{CDCl}_3$ )  $\delta$  162.0, 153.5, 151.4, 131.8, 119.6, 117.7, 111.7, 60.0, 55.8, 31.6, 29.5, 24.2, 22.7, 14.0.

HRMS-ES<sup>+</sup> calculated for  $\text{C}_{15}\text{H}_{24}\text{NO}_2$   $[\text{M}+\text{H}]^+$  250.1807, found  $[\text{M}+\text{H}]^+$  250.1803.

**Naphthol 18** was obtained according to general benzannulation procedure (34.1 mg, 70%

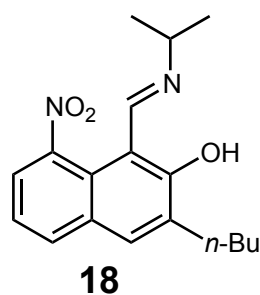

yield).  $^1\text{H NMR}$  ( $\text{CDCl}_3$ )  $\delta$  7.93 (1H, s), 7.66 (2H, d,  $J = 7.5$  Hz), 7.48 (1H, s), 7.16 (1H, dd,  $J = 8.0$  Hz), 3.71 (1H, m,  $J = 6.5$  Hz), 2.68 (2H, t,  $J = 7.0$  Hz), 1.64 (2H, tt,  $J = 8.0$  Hz), 1.44 (2H, m,  $J = 7.5$  Hz), 1.38 (6H, d,  $J = 6.5$  Hz), 0.96 (3H, t,  $J = 7.5$  Hz).  $^{13}\text{C NMR}$  ( $\text{CDCl}_3$ )  $\delta$  179.3, 156.5, 144.4, 140.3, 133.5, 132.5, 128.3, 125.8, 123.7, 121.0, 101.7, 52.6, 30.9, 29.8,

23.3, 22.7, 14.0. HRMS-ES<sup>+</sup> calculated for  $\text{C}_{18}\text{H}_{23}\text{N}_2\text{O}_3$   $[\text{M}+\text{H}]^+$  315.1709, found  $[\text{M}+\text{H}]^+$  315.1711.

**Naphthol 20** was obtained according to general benzannulation procedure (35.6 mg, 88%

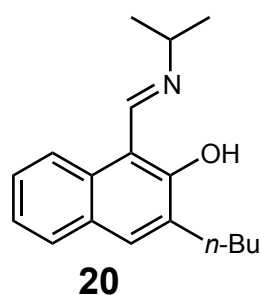

yield).  $^1\text{H NMR}$  ( $\text{CDCl}_3$ )  $\delta$  8.61 (1H, s), 7.71 (1H, d,  $J = 8.0$  Hz), 7.46 (2H, m), 7.28 (1H, t,  $J = 7.0$  Hz), 7.12 (1H, t,  $J = 7.0$  Hz), 3.70 (1H, septet,  $J = 6.5$  Hz), 2.63 (2H, t,  $J = 8.0$  Hz), 1.59 (2H, quintet,  $J = 7.5$  Hz), 1.37 (2H, sextet,  $J = 7.5$  Hz), 1.35 (6H, d,  $J = 6.5$  Hz), 0.89 (3H, t,  $J = 7.0$  Hz).  $^{13}\text{C NMR}$  ( $\text{CDCl}_3$ )  $\delta$  176.3, 154.0, 136.4, 133.7, 132.1, 127.5, 125.8, 125.0,

121.4, 116.1, 104.4, 52.6, 30.2, 28.9, 22.8, 21.8, 13.0. HRMS-EI calculated for  $\text{C}_{18}\text{H}_{23}\text{NO}$   $[\text{M}^+]$  269.1780 found 269.1783.

**Naphthol 22** was obtained according to general benzannulation procedure (47 mg, 90% yield).

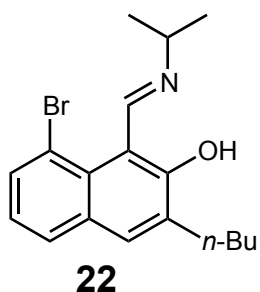

<sup>1</sup>H NMR (CDCl<sub>3</sub>) δ 9.56 (1H, s), 7.57 (1H, dd, J = 7.5, 1.0 Hz), 7.38 (1H, dd, J = 8.0, 1.0 Hz), 7.34 (1H, s), 6.94 (1H, t, J = 7.5 Hz), 3.69 (1H, septet, J = 6.5 Hz), 2.58 (2H, t, J = 7.5 Hz), 1.56 (2H, quintet, J = 8.0 Hz), 1.36 (8H, m), 0.88 (3H, t, J = 7.5 Hz). <sup>13</sup>C NMR (CDCl<sub>3</sub>) δ 180.8, 156.4, 139.2, 135.0, 133.8, 132.2, 128.9, 128.4, 122.8, 114.5, 105.0, 51.7, 31.0,

29.8, 23.4, 22.8, 14.0. HRMS-EI calculated for C<sub>18</sub>H<sub>22</sub>BrNO [M<sup>+</sup>] 347.0885 found 347.0879.

**Naphthol 24** was obtained according to general benzannulation procedure (45.1 mg, 80%

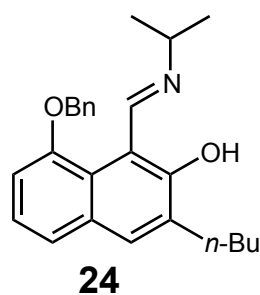

yield). <sup>1</sup>H NMR (CDCl<sub>3</sub>) δ 9.59 (1H, s), 7.42 (3H, m), 7.37 – 7.29 (3H, m), 7.15 (1H, d, J = 7.5 Hz), 7.05 (1H, t, J = 7.5 Hz), 6.95 (1H, d, J = 7.5 Hz), 3.21 (1H, septet, J = 6.5 Hz), 2.61 (2H, t, J = 7.5 Hz), 1.58 (2H, quintet, J = 8.0 Hz), 1.38 (2H, sextet, J = 7.5 Hz), 1.05 (6H, d, J = 7.0 Hz), 0.88 (3H, t, J = 7.0 Hz). <sup>13</sup>C NMR (CDCl<sub>3</sub>) δ 179.3, 159.5, 152.7, 137.5, 135.7,

134.0, 127.7, 127.6, 127.4, 127.0, 122.1, 121.3, 120.7, 108.8, 104.5, 70.4, 50.6, 30.1, 28.8, 22.1, 21.8, 13.1. HRMS-EI calculated for C<sub>25</sub>H<sub>29</sub>NO<sub>2</sub> [M<sup>+</sup>] 375.2198 found 375.2194.

**Naphthol 25** was obtained according to general benzannulation procedure (58.8 mg, 96%

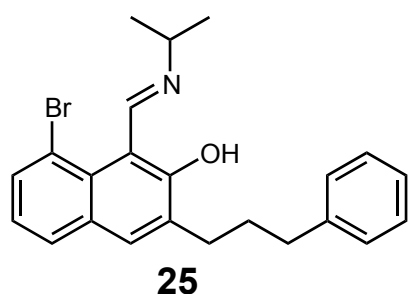

yield).  $^1\text{H}$  NMR ( $\text{CDCl}_3$ )  $\delta$  9.64 (1H, s), 7.65 (1H, dd,  $J = 7.5, 1.0$  Hz), 7.44 (1H, d,  $J = 7.5$  Hz), 7.41 (1H, s), 7.27 (2H, dd,  $J = 15, 7.5$  Hz), 7.23 (2H, d,  $J = 7.0$  Hz), 7.17 (1H, dd,  $J = 7.5$  Hz), 6.97 (1H, t,  $J = 8.0$  Hz), 3.77 (1H, m,  $J = 6.5$  Hz), 2.74 (2H, t,  $J = 8.0$  Hz), 2.73 (2H, t,  $J = 7.0$  Hz), 2.01 (2H, tt,  $J = 8.0, 7.0$  Hz), 1.43

(6H, d,  $J = 6.5$  Hz).  $^{13}\text{C}$  NMR ( $\text{CDCl}_3$ )  $\delta$  180.8, 156.3, 142.4, 138.6, 135.1, 133.8, 132.1, 128.7, 128.4, 128.3, 128.2, 125.5, 122.8, 114.5, 104.9, 51.6, 35.8, 30.4, 29.7, 23.3. HRMS-ES<sup>+</sup> calculated for  $\text{C}_{23}\text{H}_{25}\text{NOBr}$   $[\text{M}+\text{H}]^+$  410.1120, found  $[\text{M}+\text{H}]^+$  410.1102.

**Naphthol 26** was obtained according to general benzannulation procedure (70.9 mg, 96%

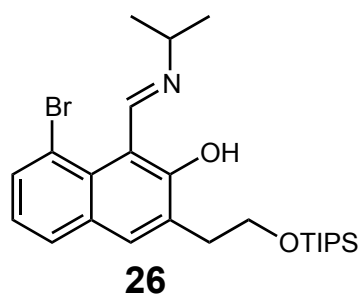

yield).  $^1\text{H}$  NMR ( $\text{CDCl}_3$ )  $\delta$  9.54 (1H, s), 7.56 (1H, dd,  $J = 8.0, 1.0$  Hz), 7.46 (1H, s), 7.36 (1H, dd,  $J = 7.5, 1.0$  Hz), 6.89 (1H, t,  $J = 8.0$  Hz), 3.90 (2H, t,  $J = 6.5$  Hz), 3.70 (1H, septet,  $J = 6.5$  Hz), 2.83 (2H, t,  $J = 6.5$  Hz), 1.33 (6H, d,  $J = 7.0$  Hz), 0.97 (3H, m), 0.93 (18H, d,  $J = 5.5$  Hz).  $^{13}\text{C}$  NMR ( $\text{CDCl}_3$ )  $\delta$  180.9, 156.3, 137.0,

135.7, 133.9, 132.4, 128.8, 128.5, 122.8, 114.5, 105.0, 62.3, 51.6, 33.6, 23.4, 18.0, 12.0.

HRMS-EI calculated for  $\text{C}_{25}\text{H}_{38}\text{BrNO}_2\text{Si}$   $[\text{M}^+]$  491.1855 found 491.1862.

**Naphthol 27** was obtained according to general benzannulation procedure (45.7 mg, 90%

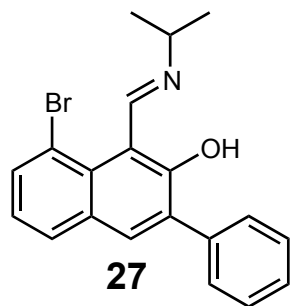

yield).  $^1\text{H}$  NMR ( $\text{CDCl}_3$ )  $\delta$  9.56 (1H, s), 7.62 (1H, d,  $J = 7.5$  Hz), 7.57 (3H, m), 7.45 (1H, d,  $J = 7.5$  Hz), 7.37 (2H, t,  $J = 7.5$  Hz), 7.28 (1H, t,  $J = 7.5$  Hz), 6.93 (1H, t,  $J = 7.5$  Hz), 3.69 (1H, septet,  $J = 6.5$  Hz), 1.33 (6H, d,  $J = 6.5$  Hz).  $^{13}\text{C}$  NMR ( $\text{CDCl}_3$ )  $\delta$  179.6, 156.5, 138.0, 137.5, 136.9, 134.7, 132.9, 129.2, 129.2, 128.6, 128.1, 127.5, 123.1, 114.6, 105.7,

51.9, 23.4. HRMS-EI calculated for  $\text{C}_{20}\text{H}_{18}\text{BrNO}$  [ $\text{M}^+$ ] 367.0572 found 367.0577.

**Naphthol 28** was obtained according to general benzannulation procedure (46.1 mg, 93%

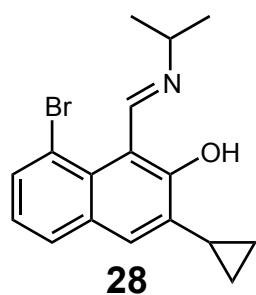

yield).  $^1\text{H}$  NMR ( $\text{CDCl}_3$ )  $\delta$  9.65 (1H, s), 7.61 (1H, d,  $J = 7.5$  Hz), 7.40 (1H, d, 7.5 Hz), 7.08 (1H, s), 6.94 (1H, dd,  $J = 8.0, 7.5$  Hz), 3.77 (1H, m,  $J = 6.5$  Hz), 2.29 (1H, tt,  $J = 8.5, 5.5$  Hz), 1.43 (6H, d,  $J = 6.5$  Hz), 0.99 (2H, td,  $J = 6.0, 4.5$  Hz), 0.66 (2H, dd,  $J = 6.0, 4.0$  Hz).  $^{13}\text{C}$  NMR ( $\text{CDCl}_3$ )  $\delta$  181.2, 156.5, 140.1, 133.7, 131.7, 130.8, 128.7, 128.3, 122.8, 114.4, 104.7, 51.6,

23.3, 9.8, 7.3. HRMS-ES $^+$  calculated for  $\text{C}_{17}\text{H}_{19}\text{NOBr}$  [ $\text{M}+\text{H}$ ] $^+$  332.0650, found [ $\text{M}+\text{H}$ ] $^+$  332.0646.

**Naphthol 29** was obtained according to general benzannulation procedure (54.8 mg, 98%

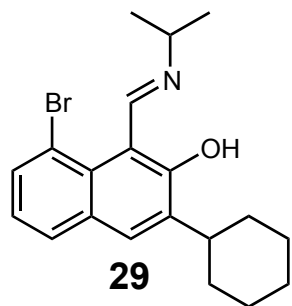

yield).  $^1\text{H}$  NMR ( $\text{CDCl}_3$ )  $\delta$  9.61 (1H, s), 7.63 (1H, d,  $J = 8.0$  Hz), 7.47 (1H, d,  $J = 7.5$  Hz), 7.37 (1H, s), 6.97 (1H, dd,  $J = 8.0, 7.5$  Hz), 3.75 (1H, m,  $J = 6.5$  Hz), 3.08 (1H, tt,  $J = 12, 11.5$  Hz), 1.92 (2H, d,  $J = 12.5$  Hz), 1.84 (2H, d,  $J = 13$  Hz), 1.51 (2H, m), 1.41 (6H, d,  $J = 6.5$  Hz), 1.29 (4H, m).  $^{13}\text{C}$  NMR ( $\text{CDCl}_3$ )  $\delta$  180.3, 156.3, 143.9, 133.8, 132.8, 131.9, 128.9,

128.5, 122.8, 114.4, 104.9, 51.6, 36.1, 32.9, 26.9, 26.5, 23.4. HRMS-ES<sup>+</sup> calculated for  $\text{C}_{20}\text{H}_{25}\text{NOBr}$   $[\text{M}+\text{H}]^+$  374.1120, found  $[\text{M}+\text{H}]^+$  374.1113.

**Naphthol 30** was obtained according to general benzannulation procedure (48.4 mg, 93%

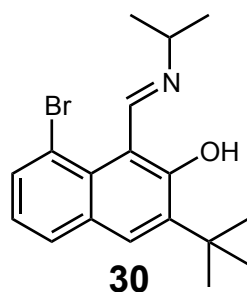

yield).  $^1\text{H}$  NMR ( $\text{CDCl}_3$ )  $\delta$  9.53 (1H, s), 7.62 (1H, dd,  $J = 8.0, 1.0$  Hz), 7.47 (1H, d,  $J = 1.5$  Hz), 7.46 (1H, s), 6.96 (1H, dd,  $J = 7.5$  Hz), 3.74 (1H, m,  $J = 6.5$  Hz), 1.45 (9H, s), 1.42 (6H, d,  $J = 6.5$  Hz).  $^{13}\text{C}$  NMR ( $\text{CDCl}_3$ )  $\delta$  181.5, 155.9, 145.4, 133.8, 133.3, 132.5, 128.8, 128.7, 122.7, 114.0, 105.8, 51.5, 35.0, 29.3, 23.4. HRMS-ES<sup>+</sup> calculated for  $\text{C}_{18}\text{H}_{23}\text{NOBr}$   $[\text{M}+\text{H}]^+$  348.0963,

found  $[\text{M}+\text{H}]^+$  348.0965.

# NMR DATA

## Pyridinium 5

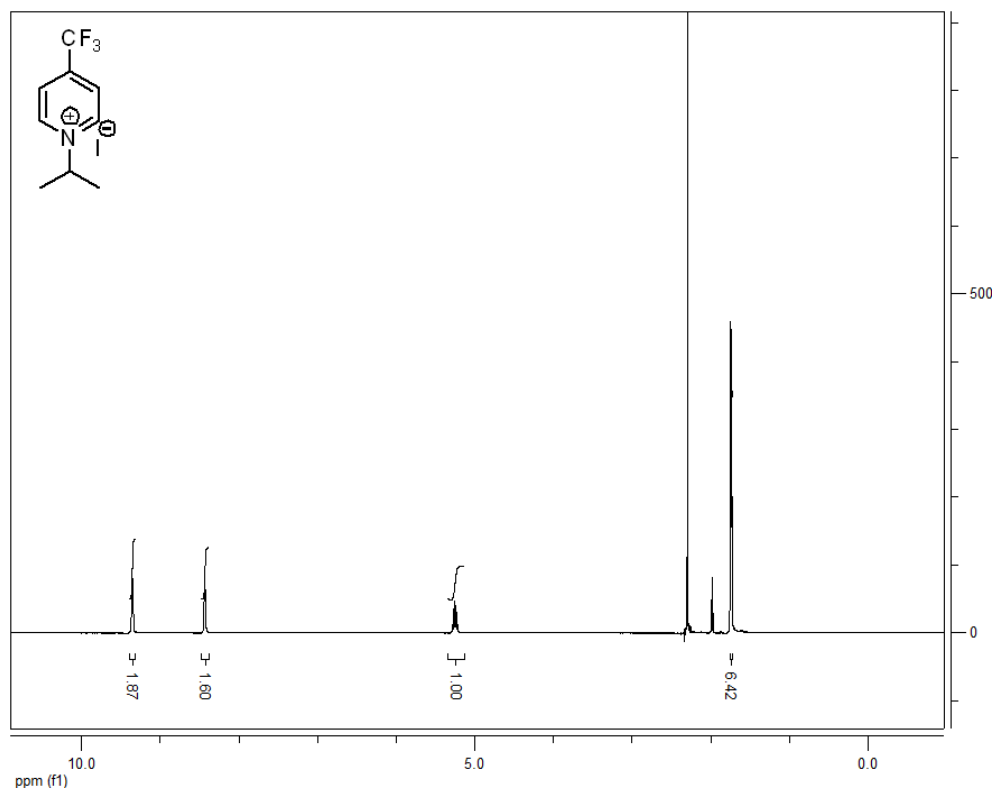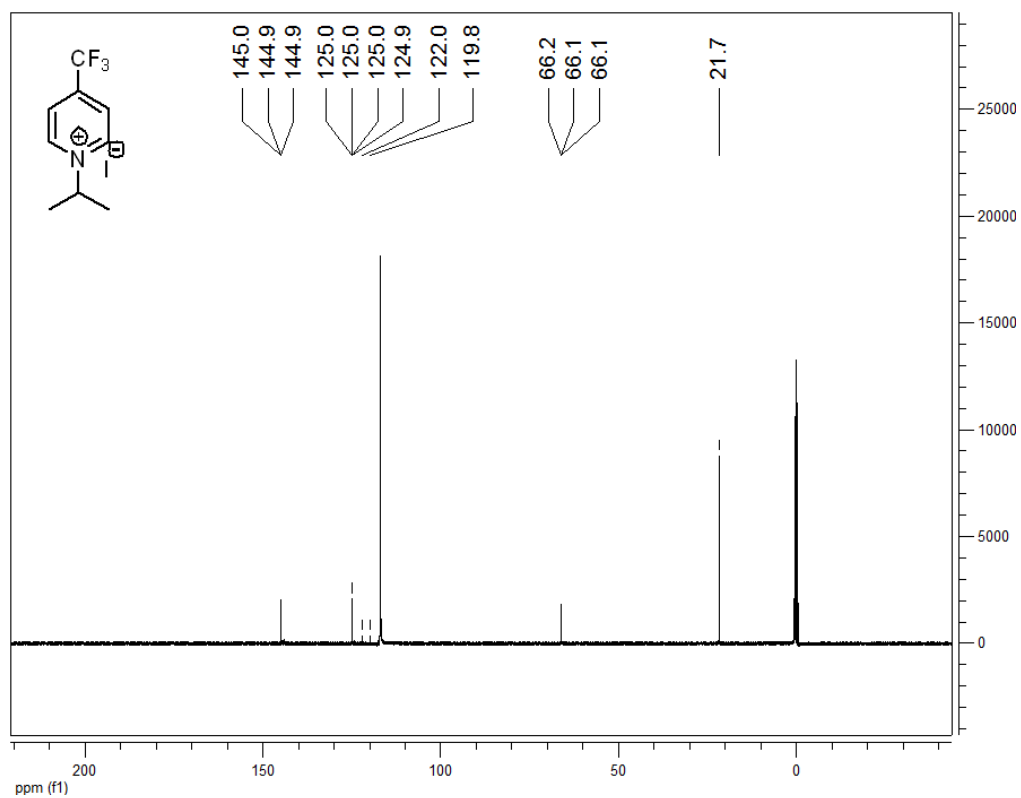

# Pyridinium 7

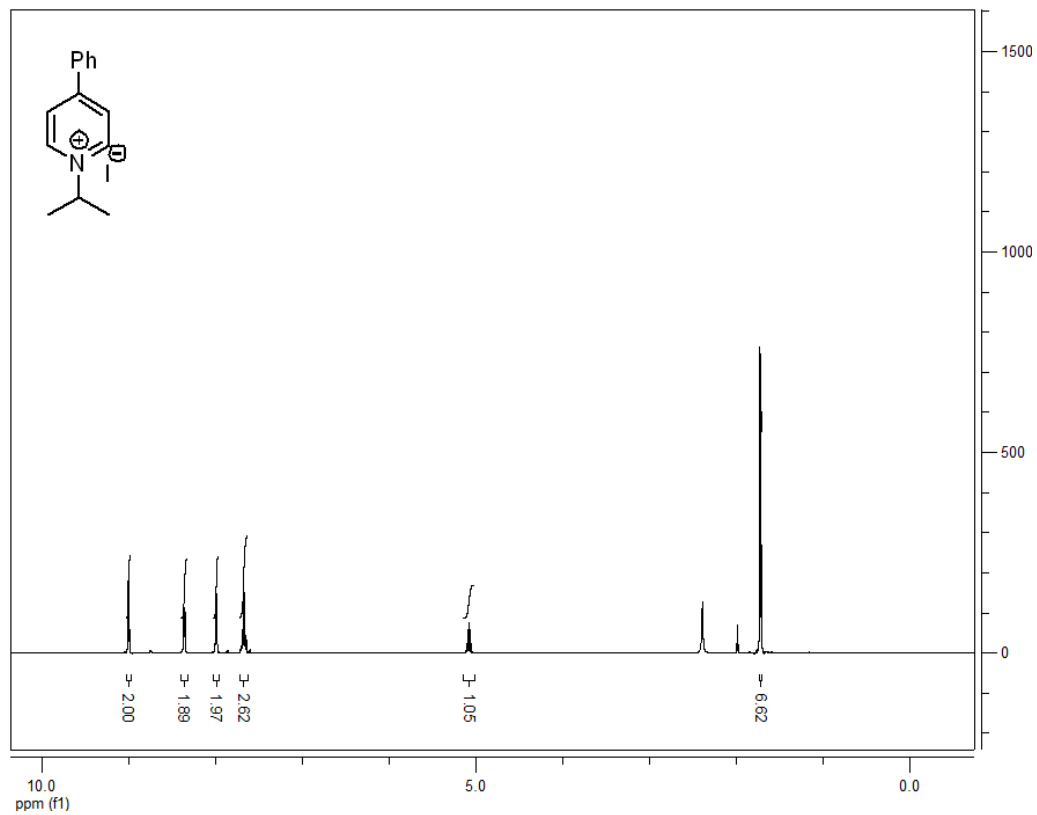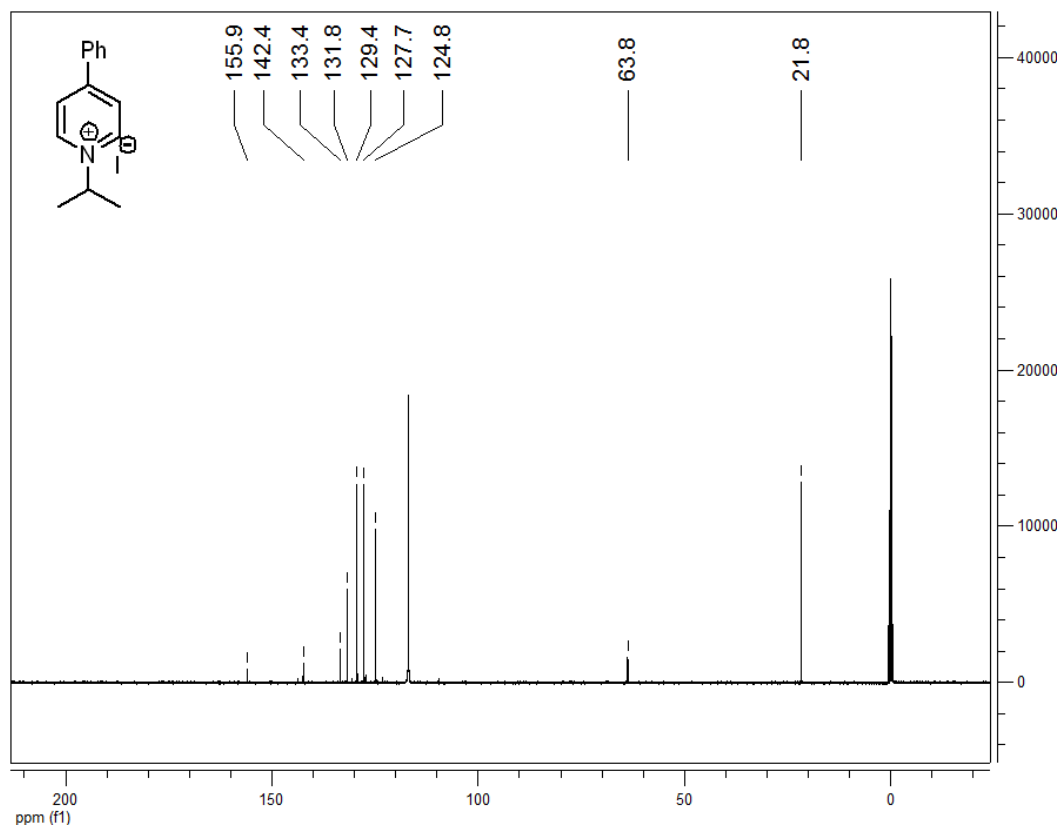

# Pyridinium 9

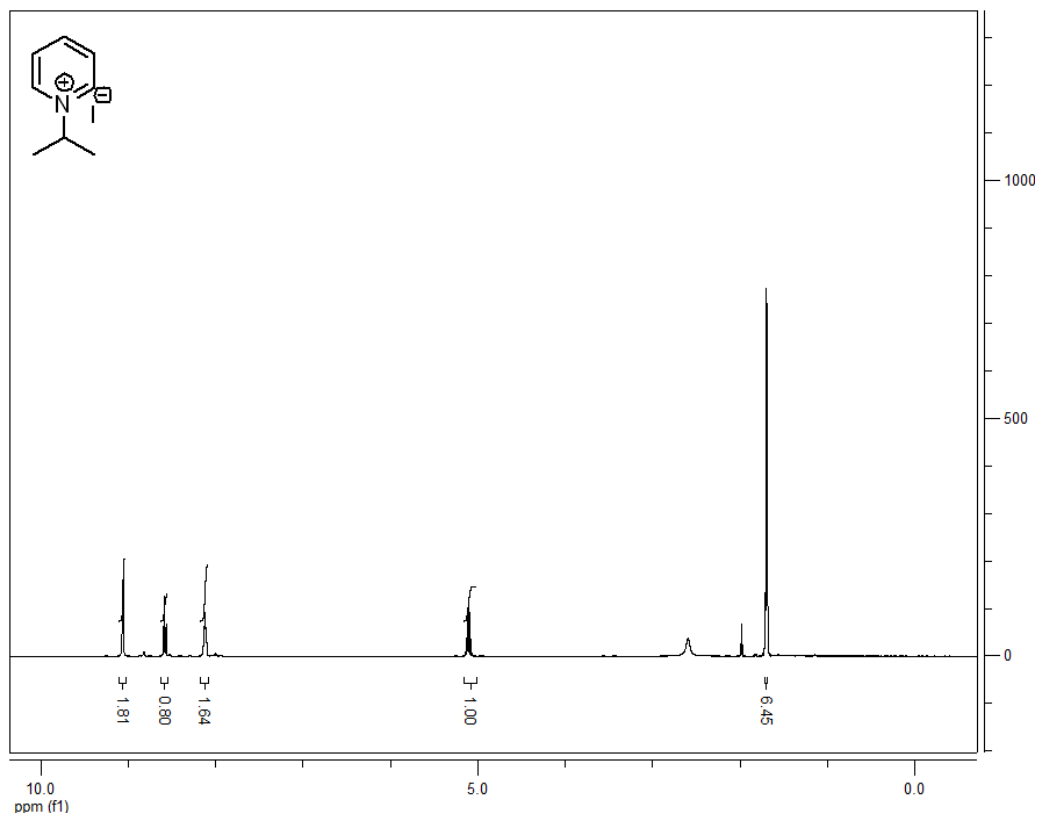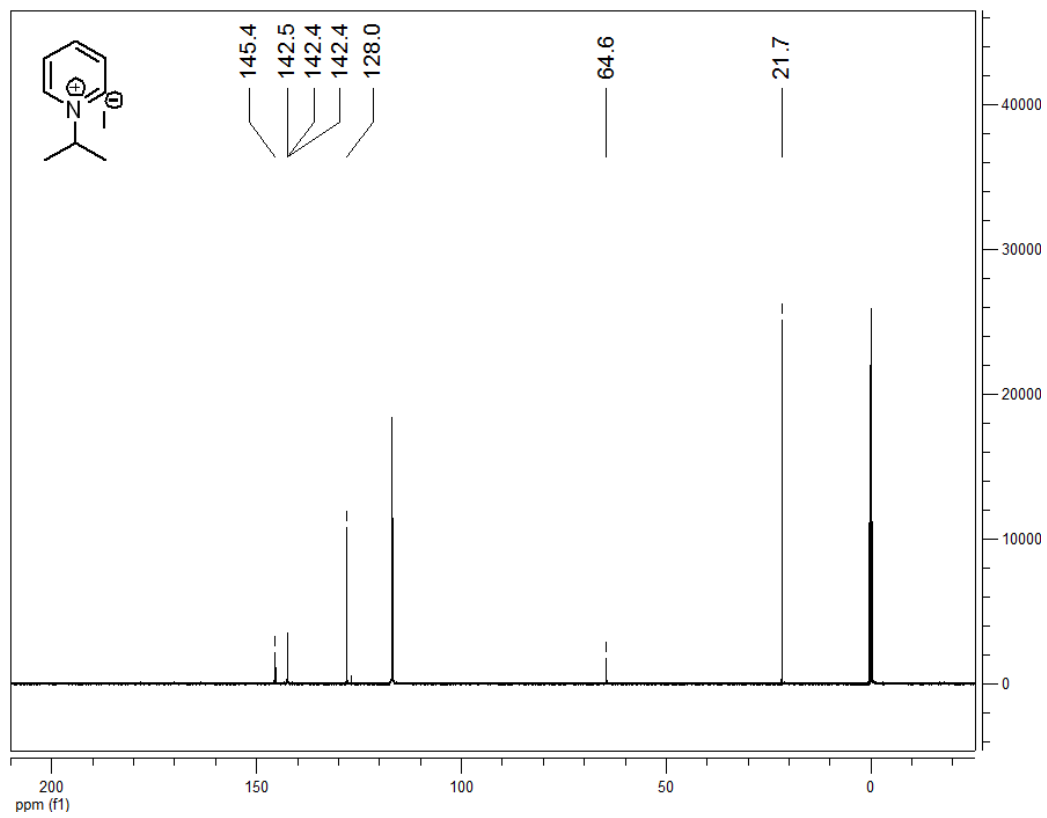



# Pyridinium 11

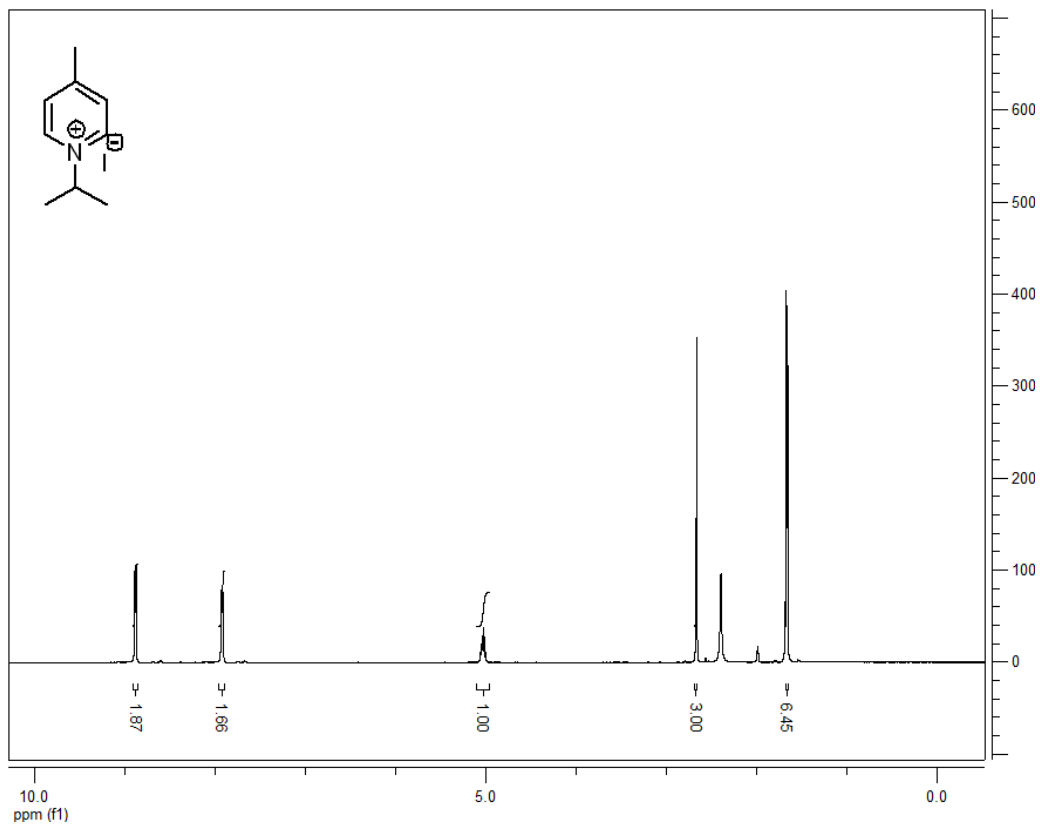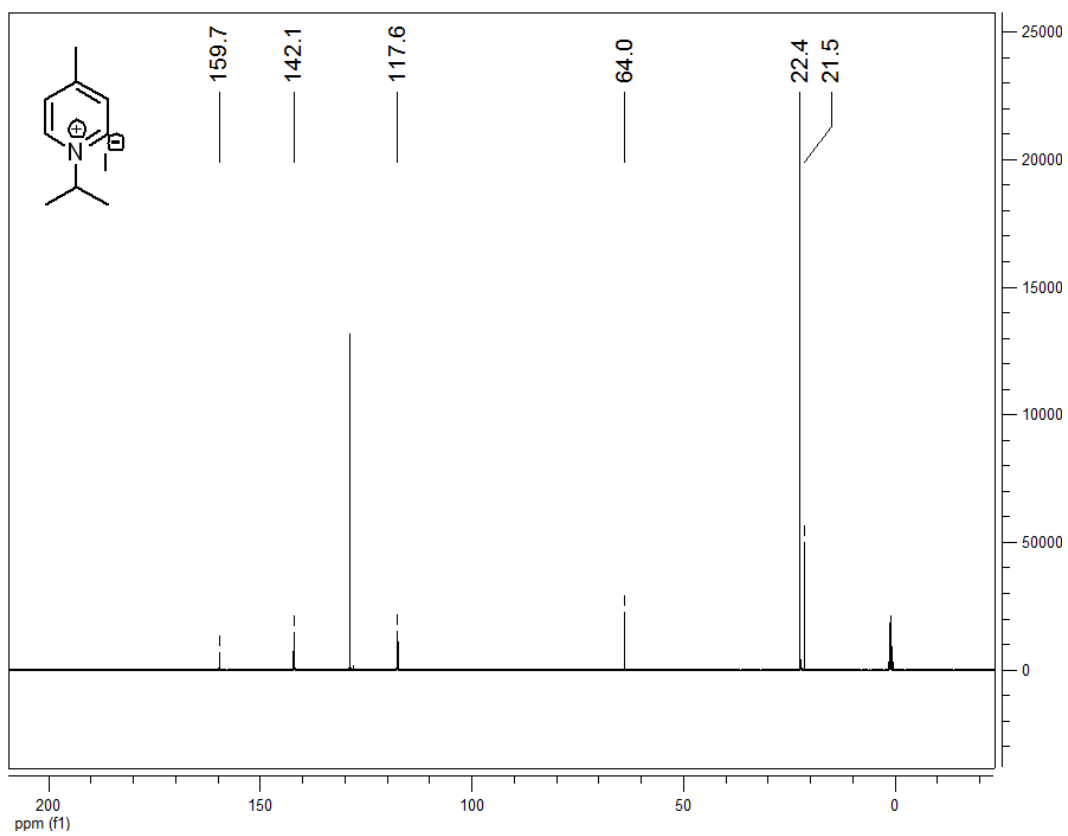

# Pyridinium 13

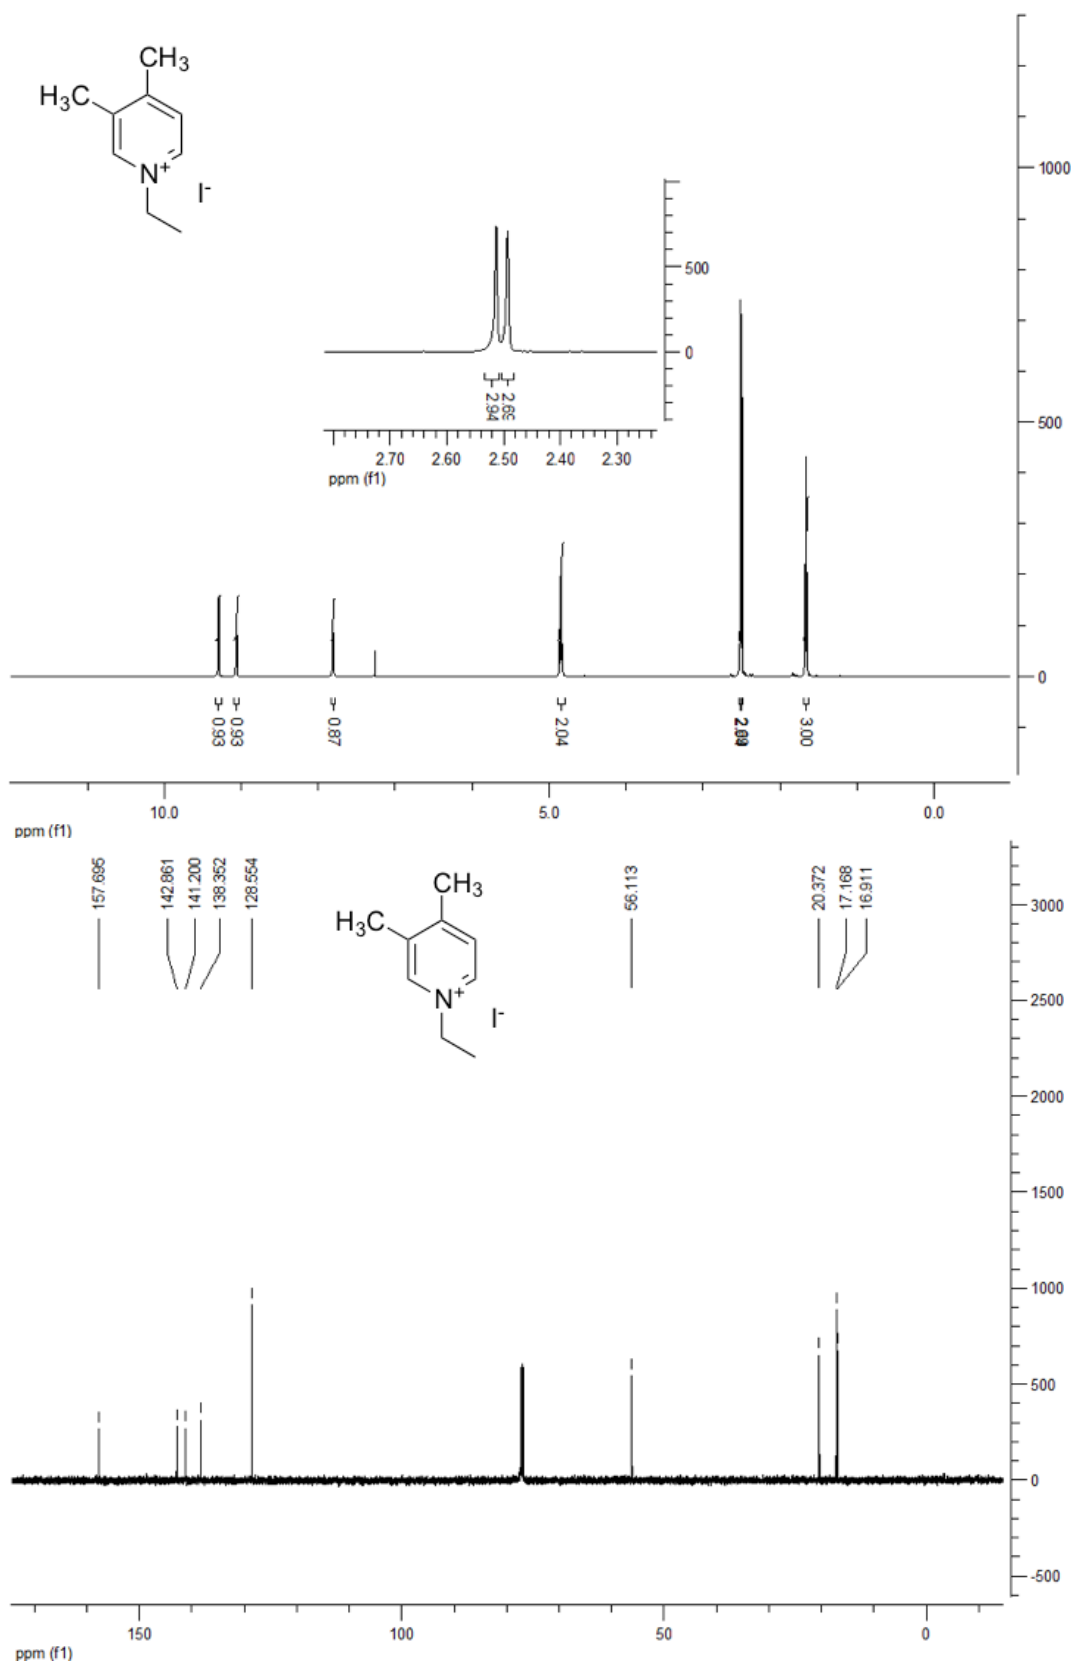

# Pyridinium 15

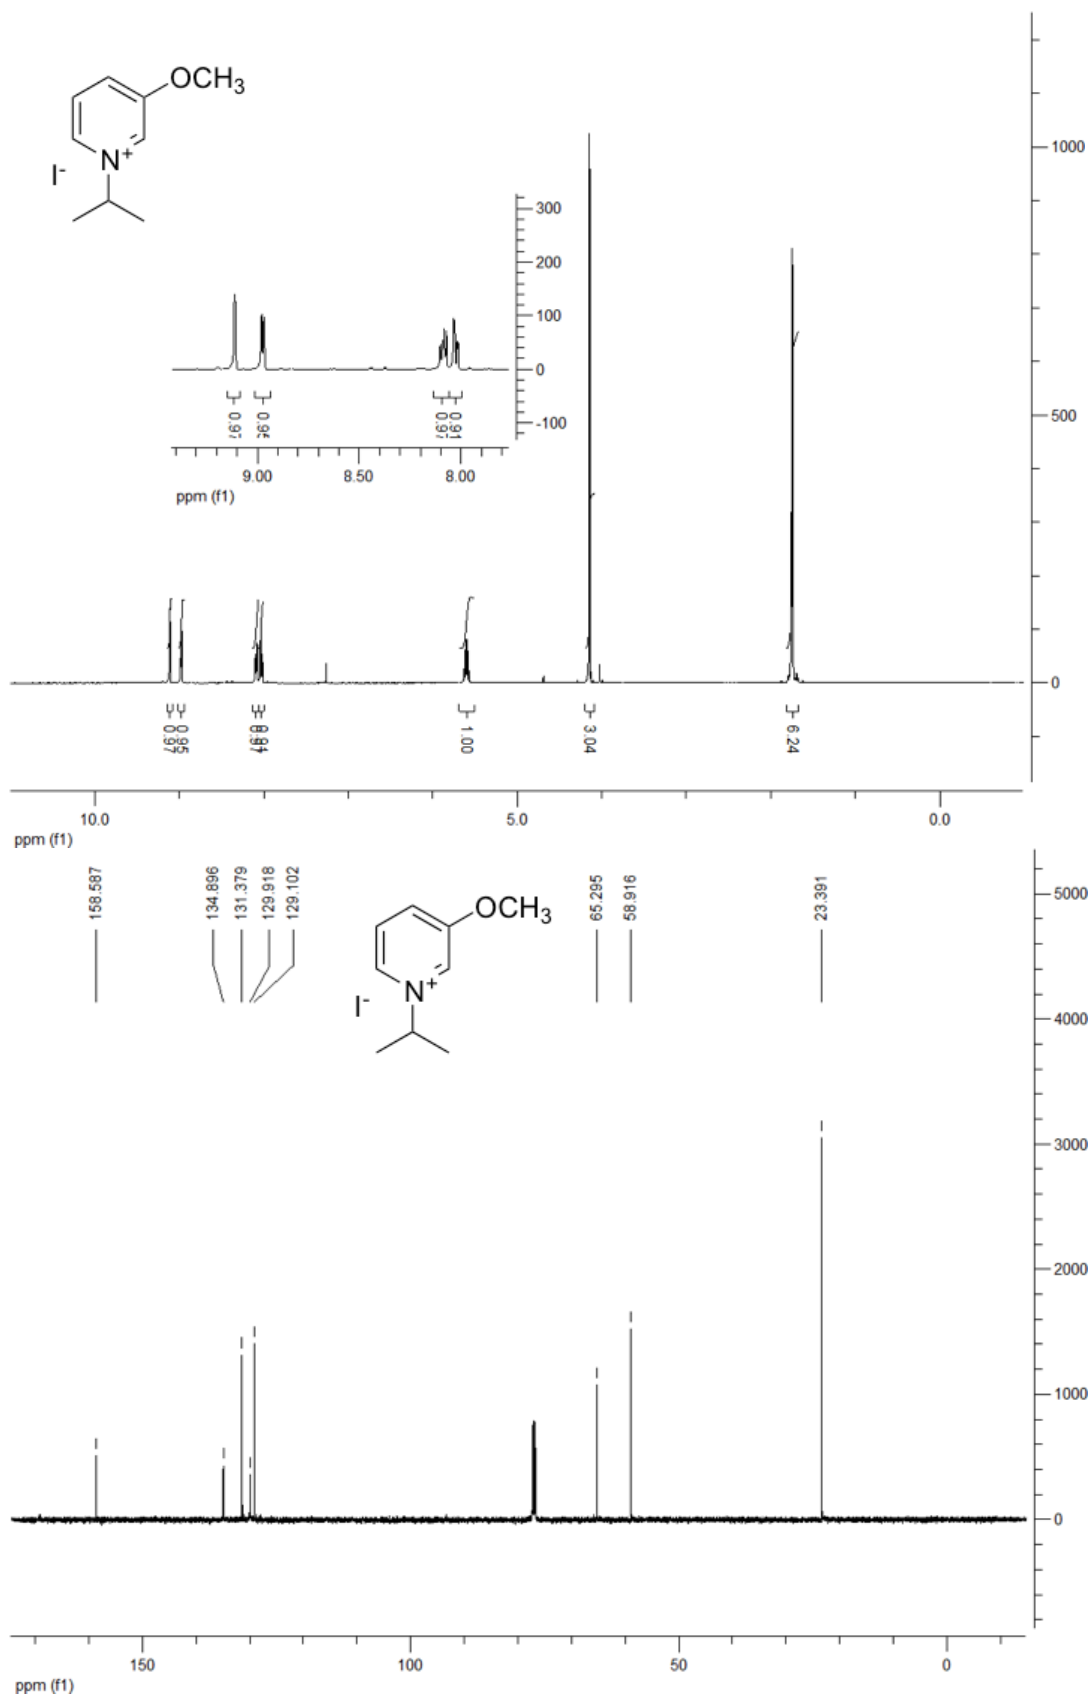

# Isoquinolinium 17

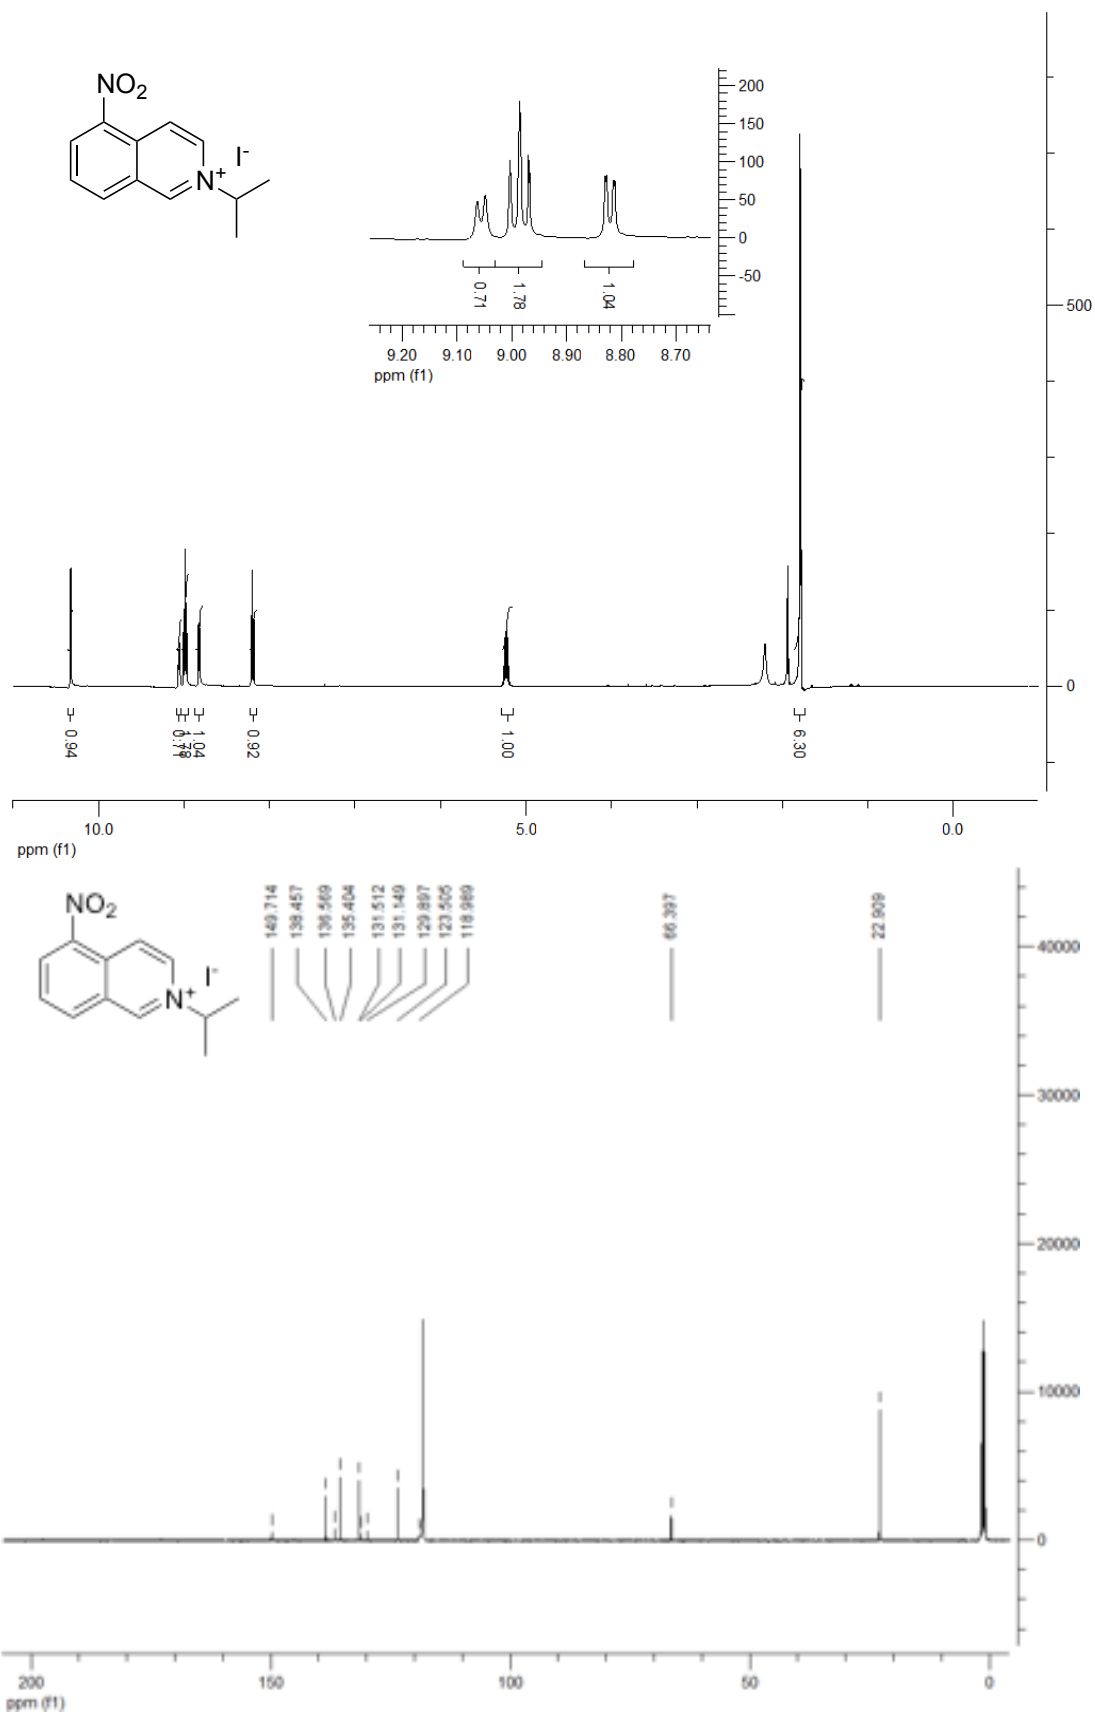

# Isoquinolinium 19

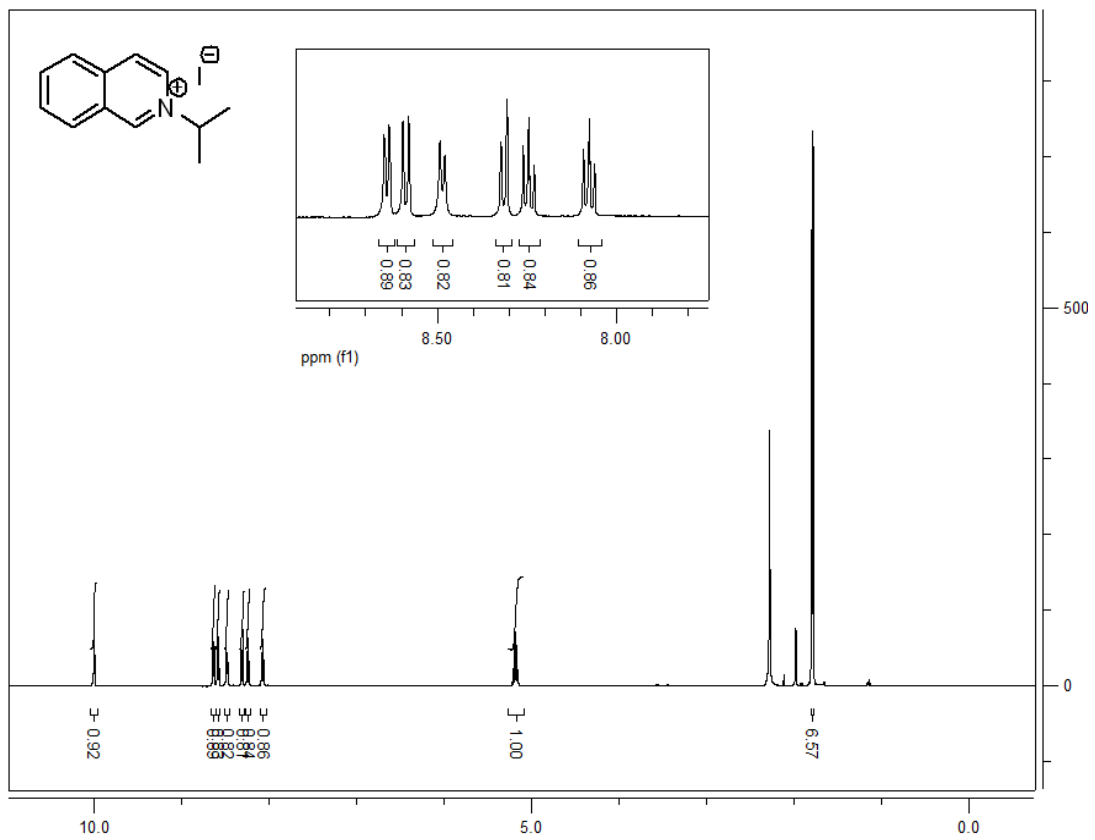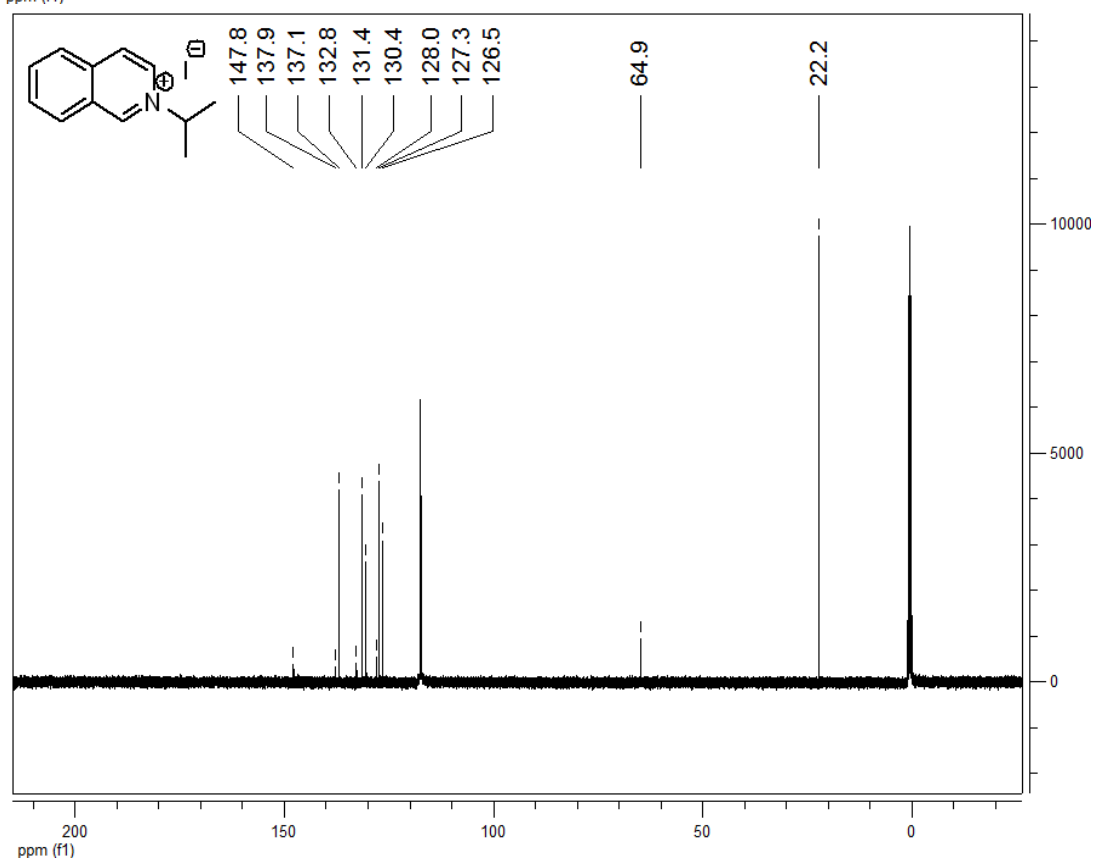

# Isoquinolinium 21

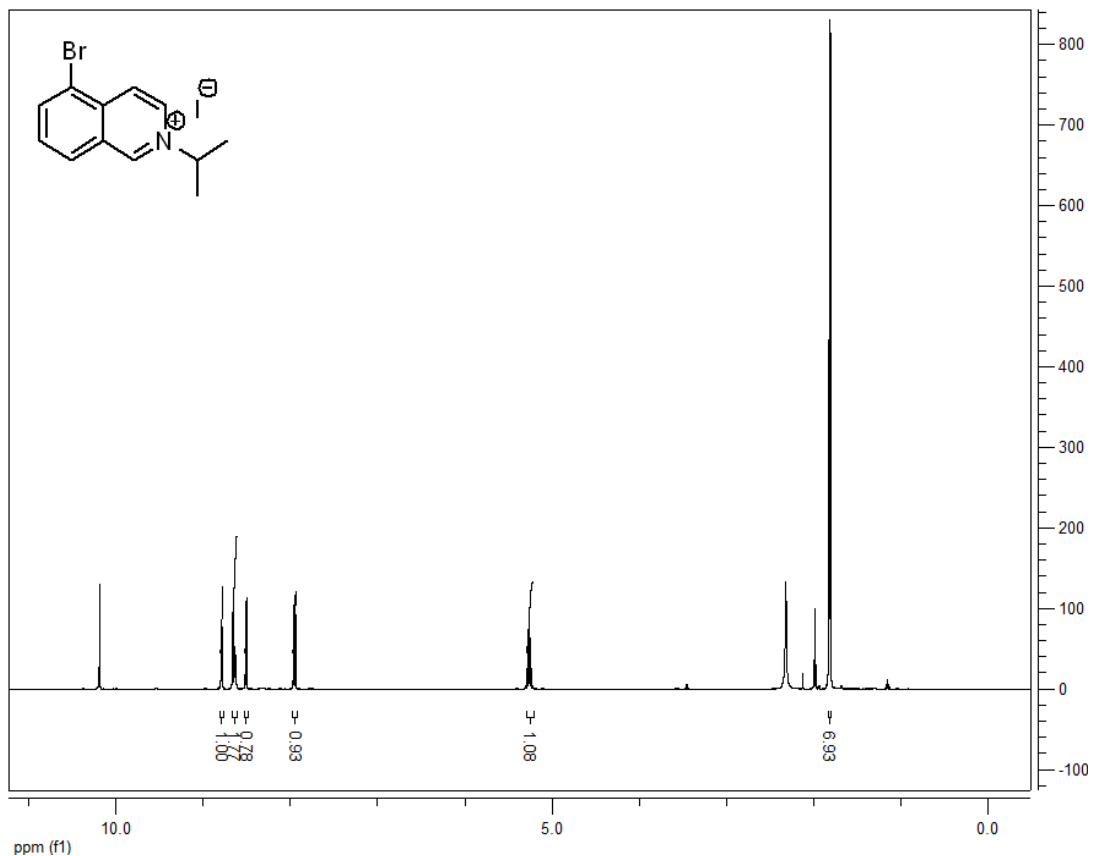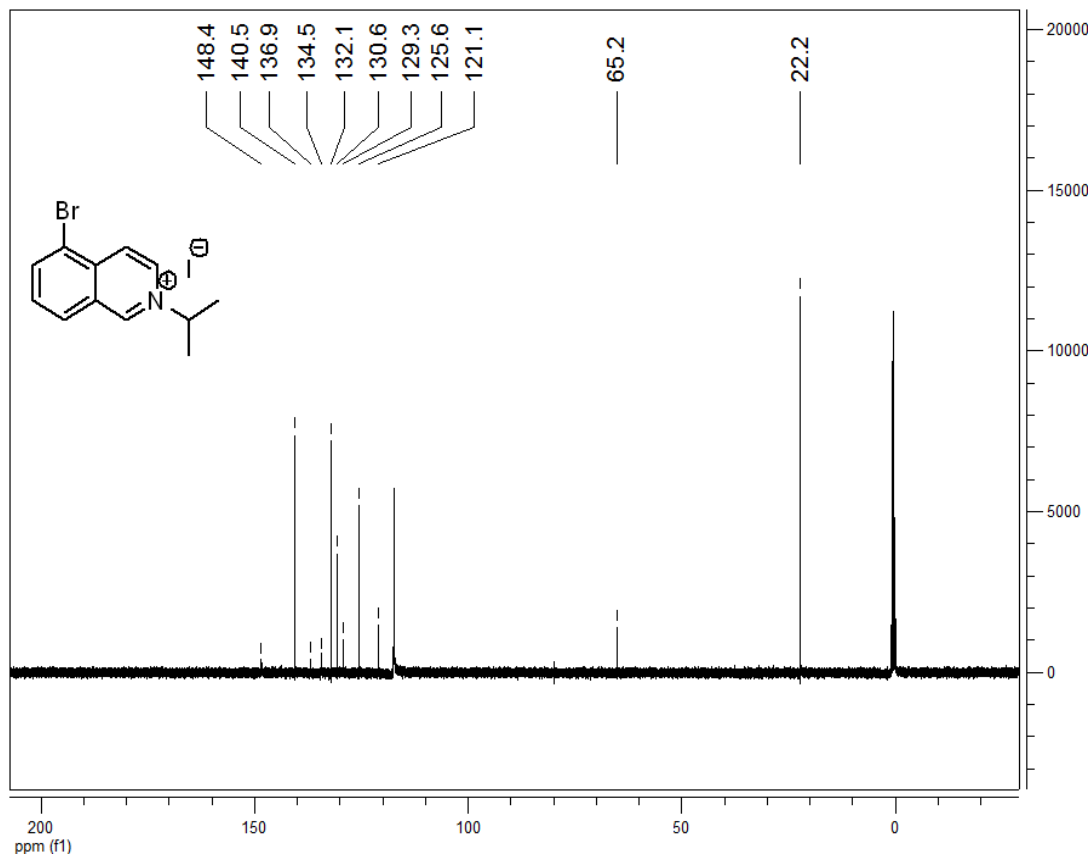

# Isoquinolinium 23

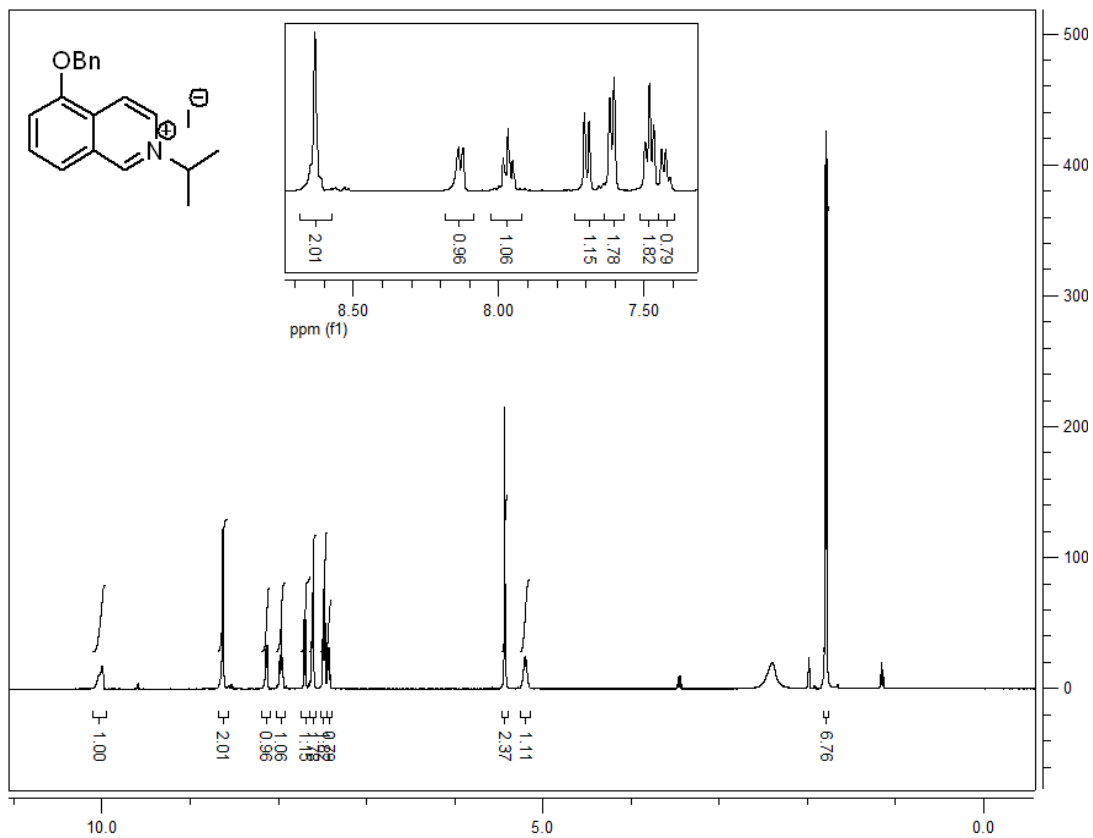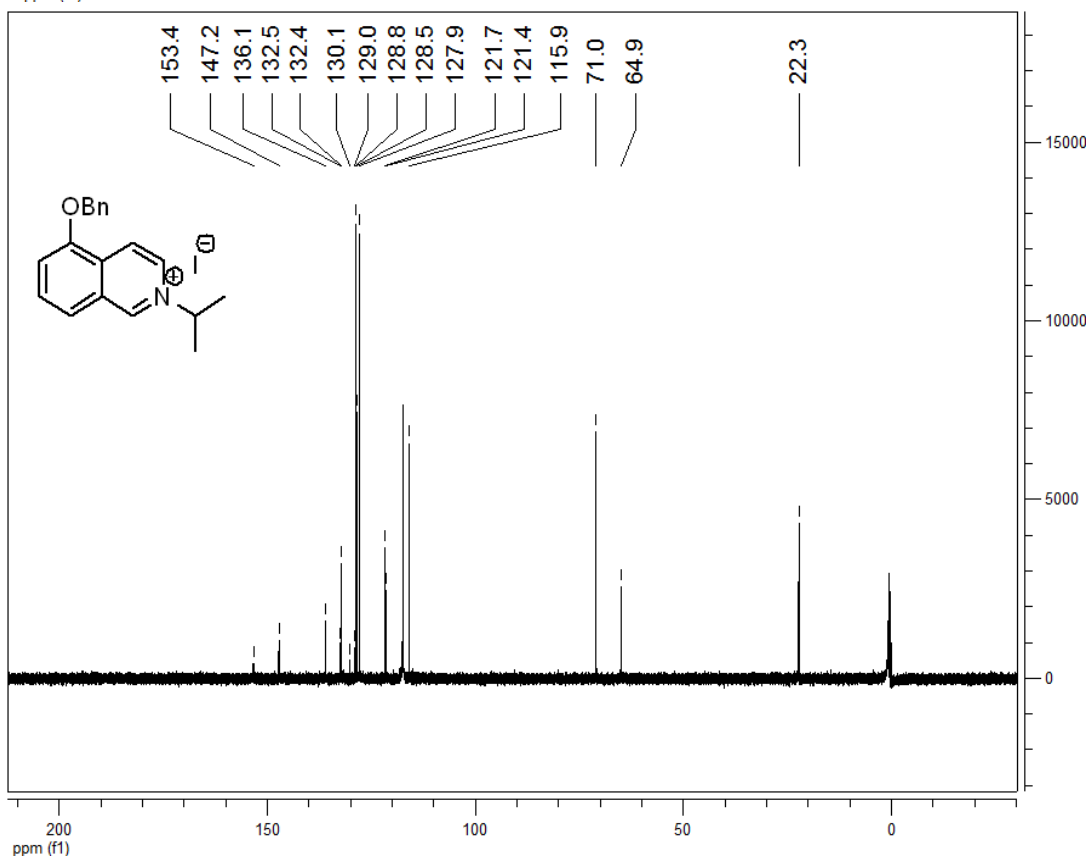

# Phenol 4

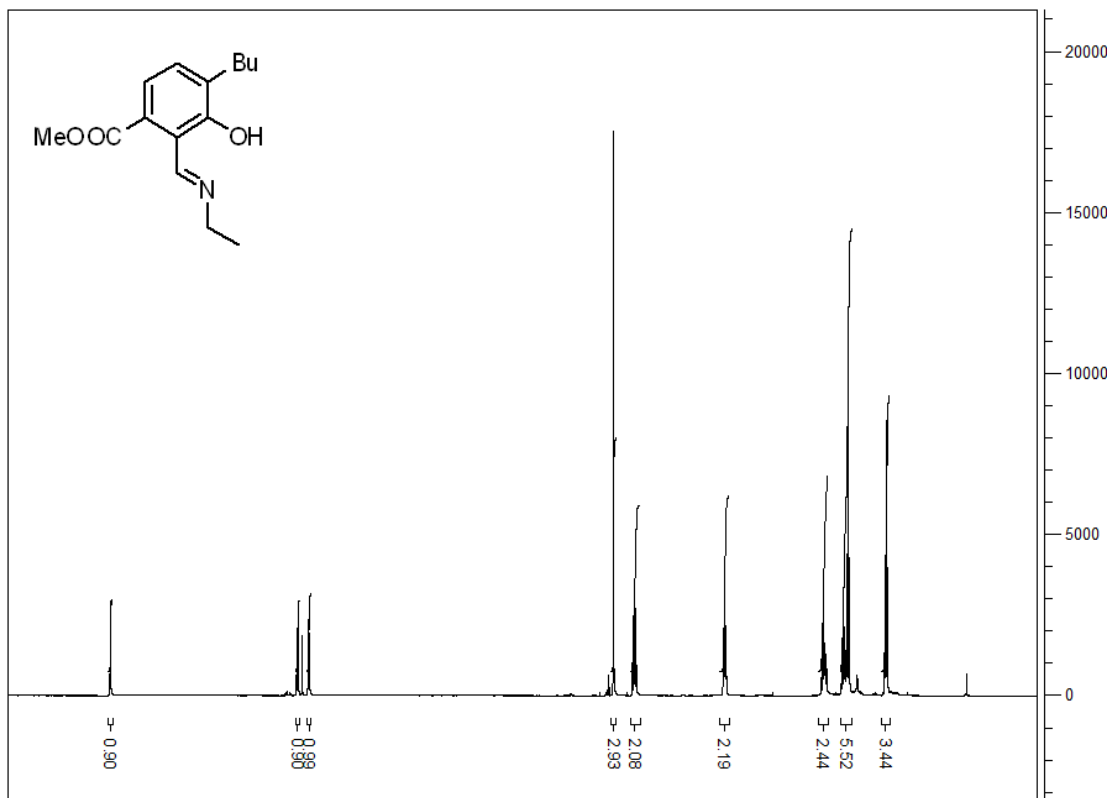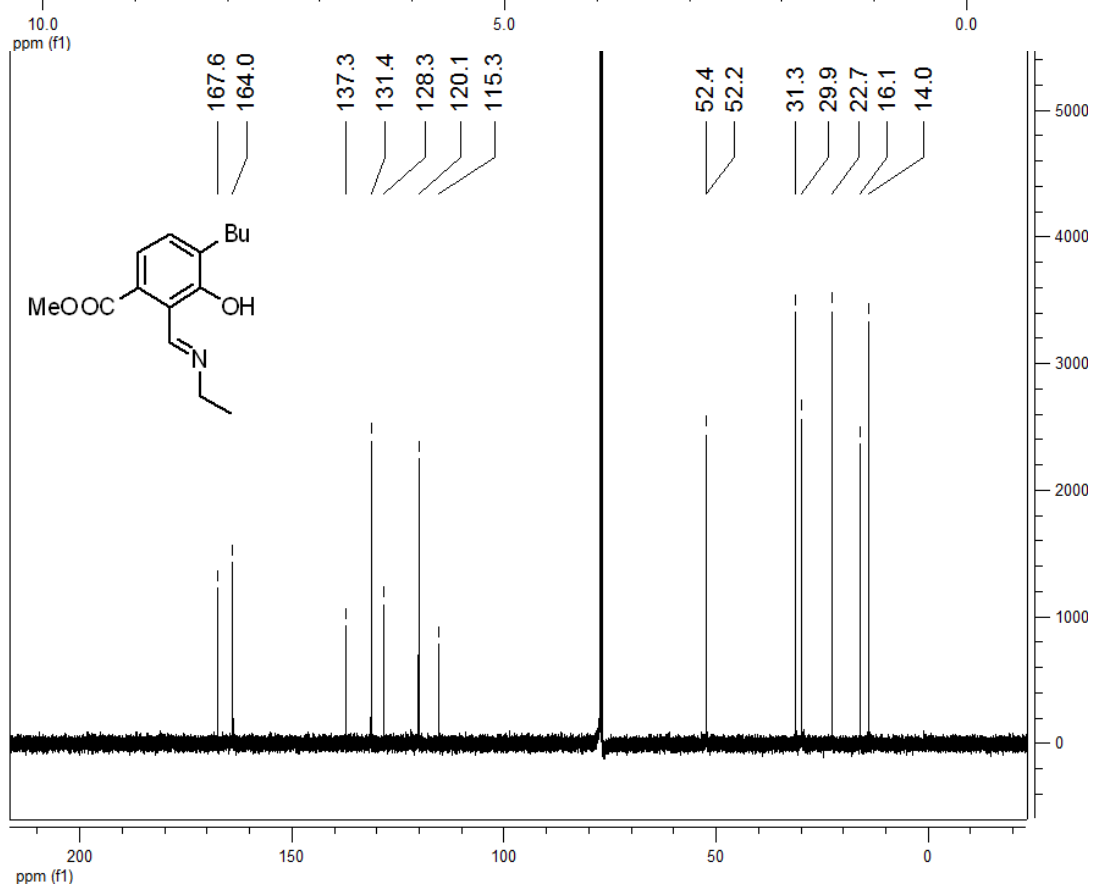



# Phenol 6

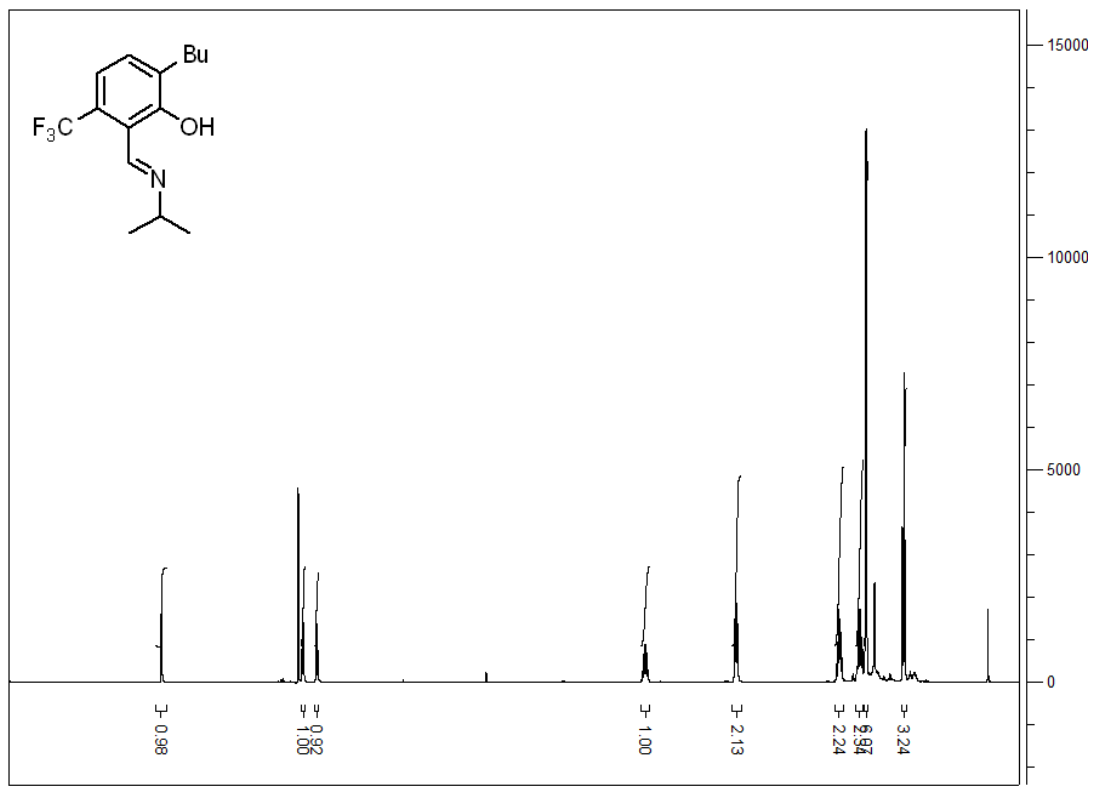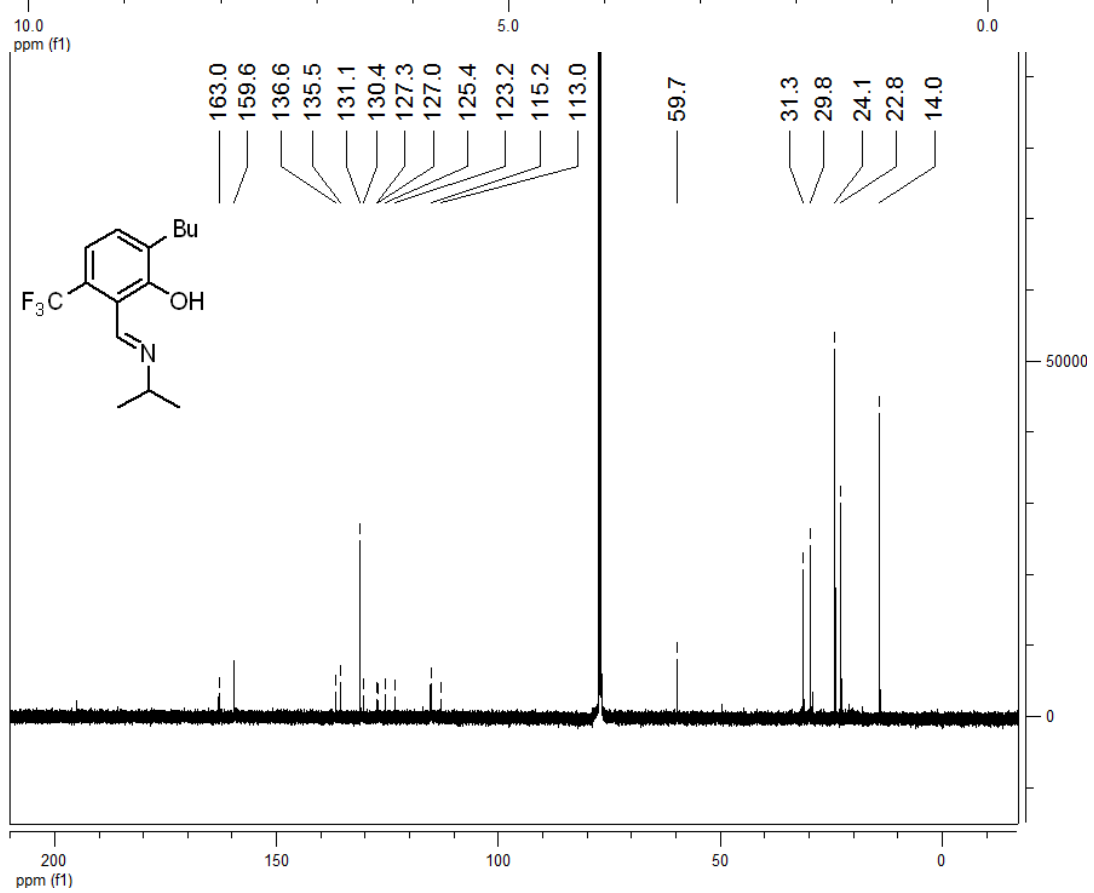

# Phenol 8

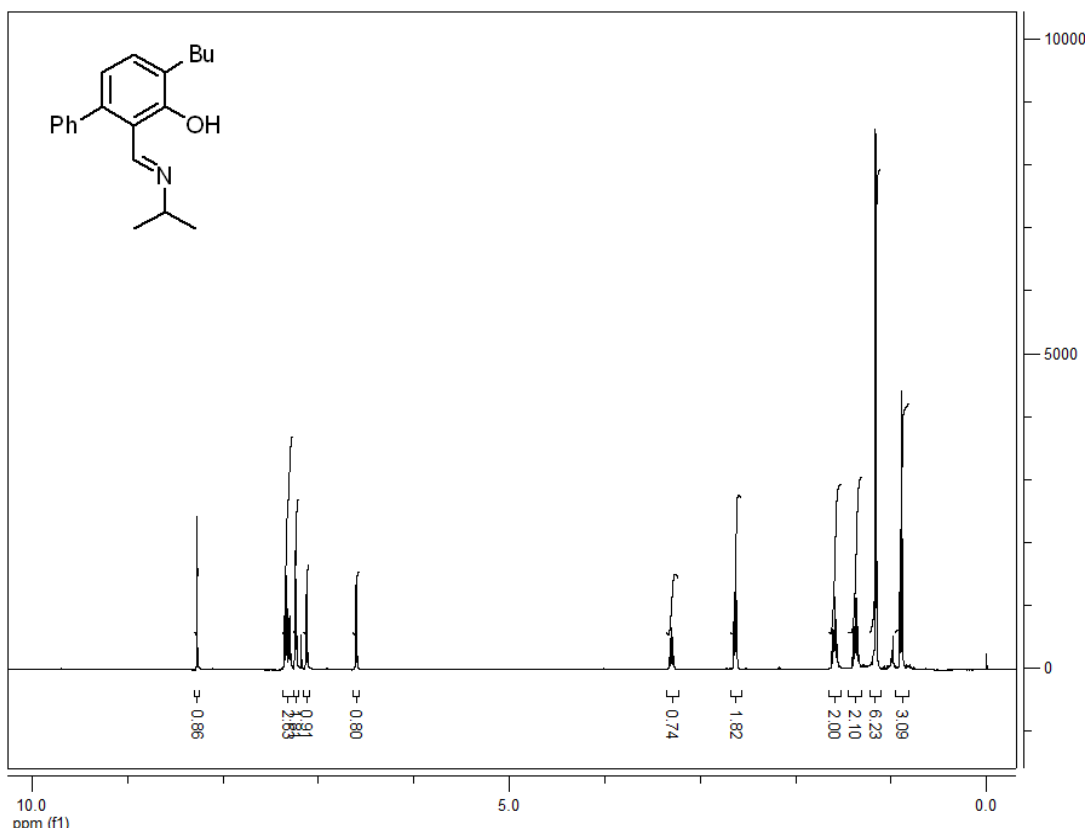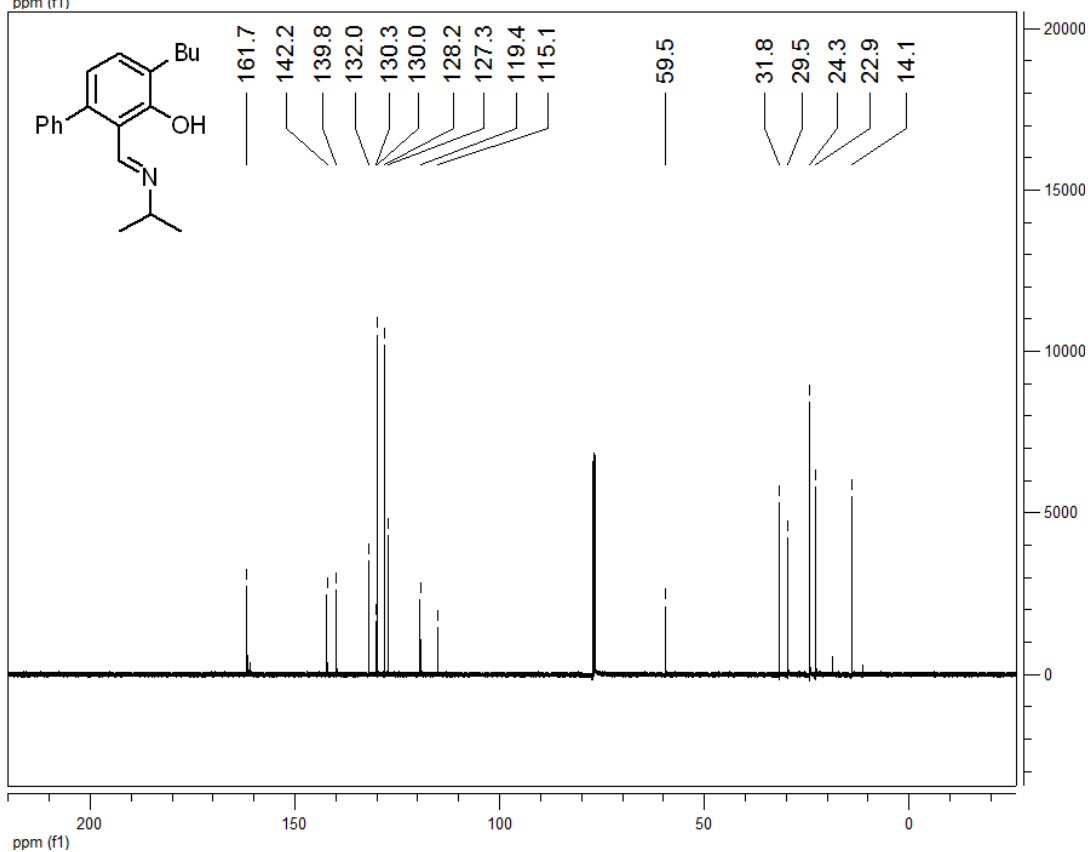

# Phenol 10

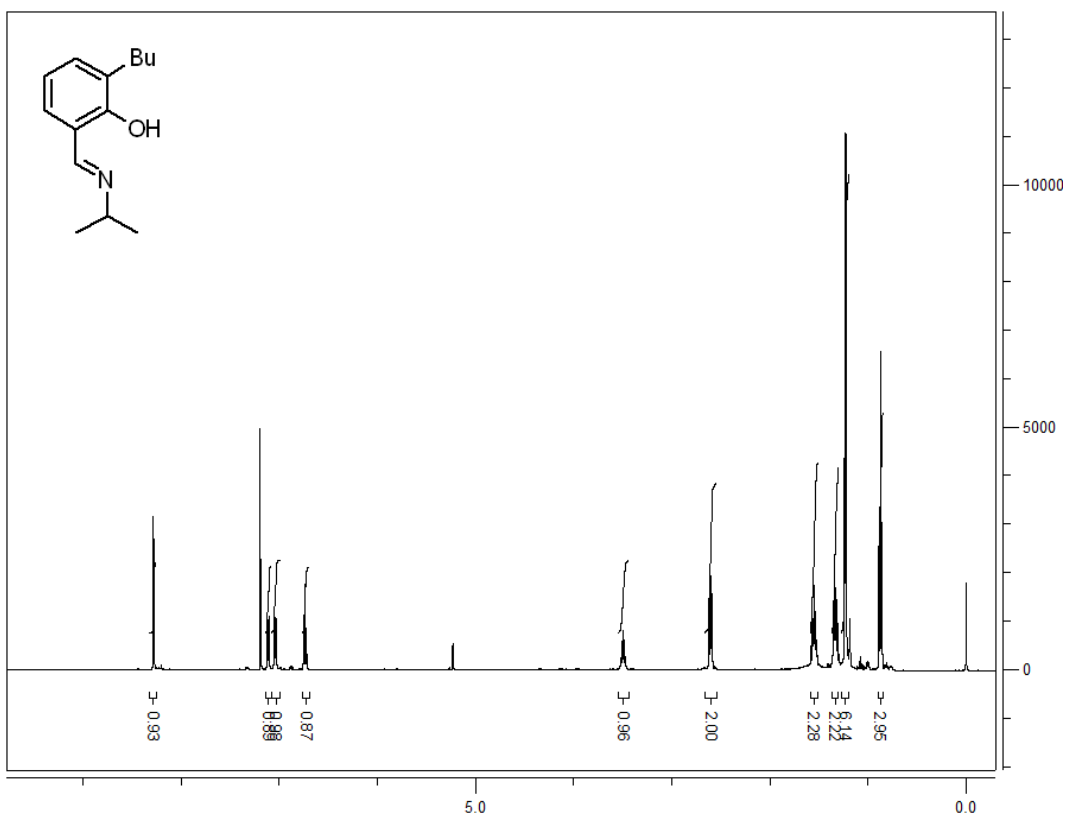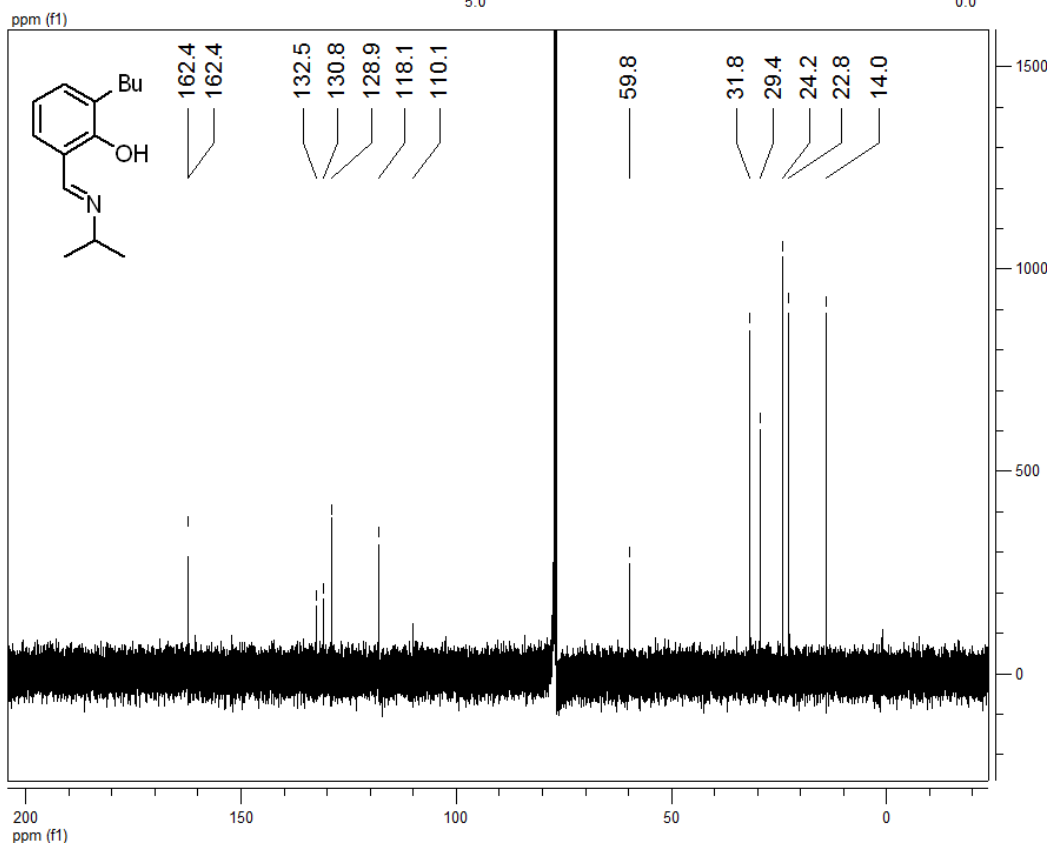

# Phenol 12

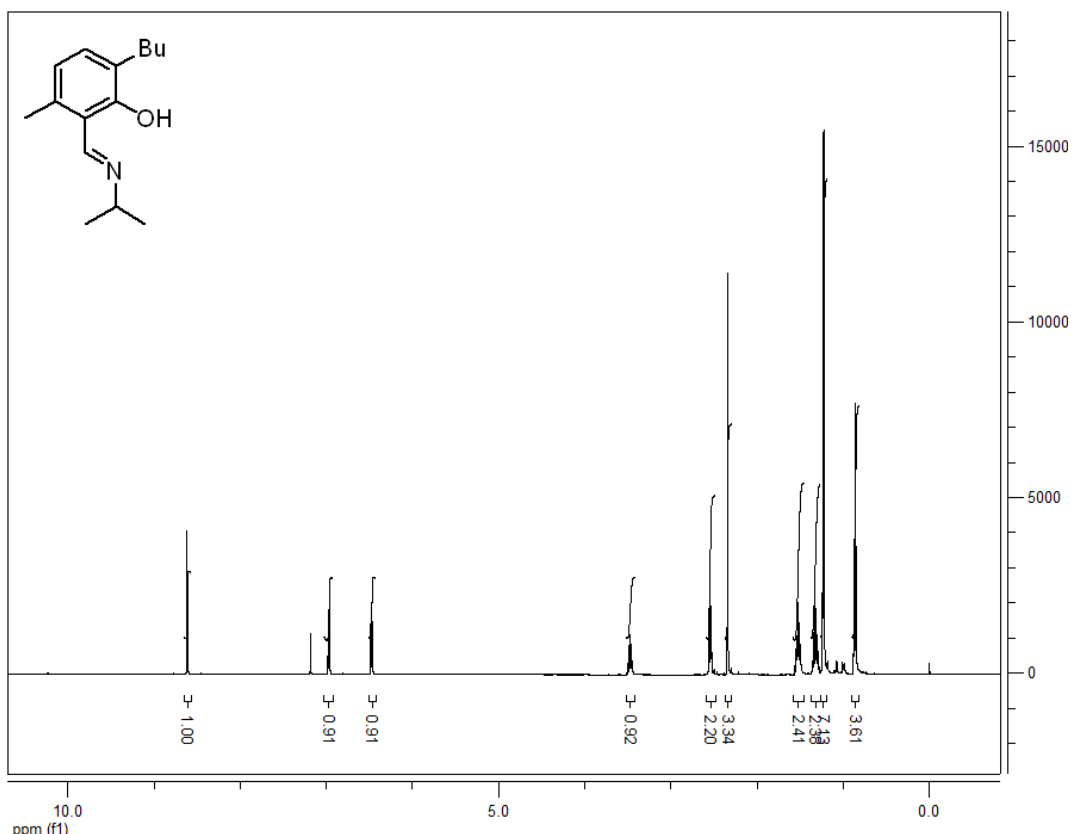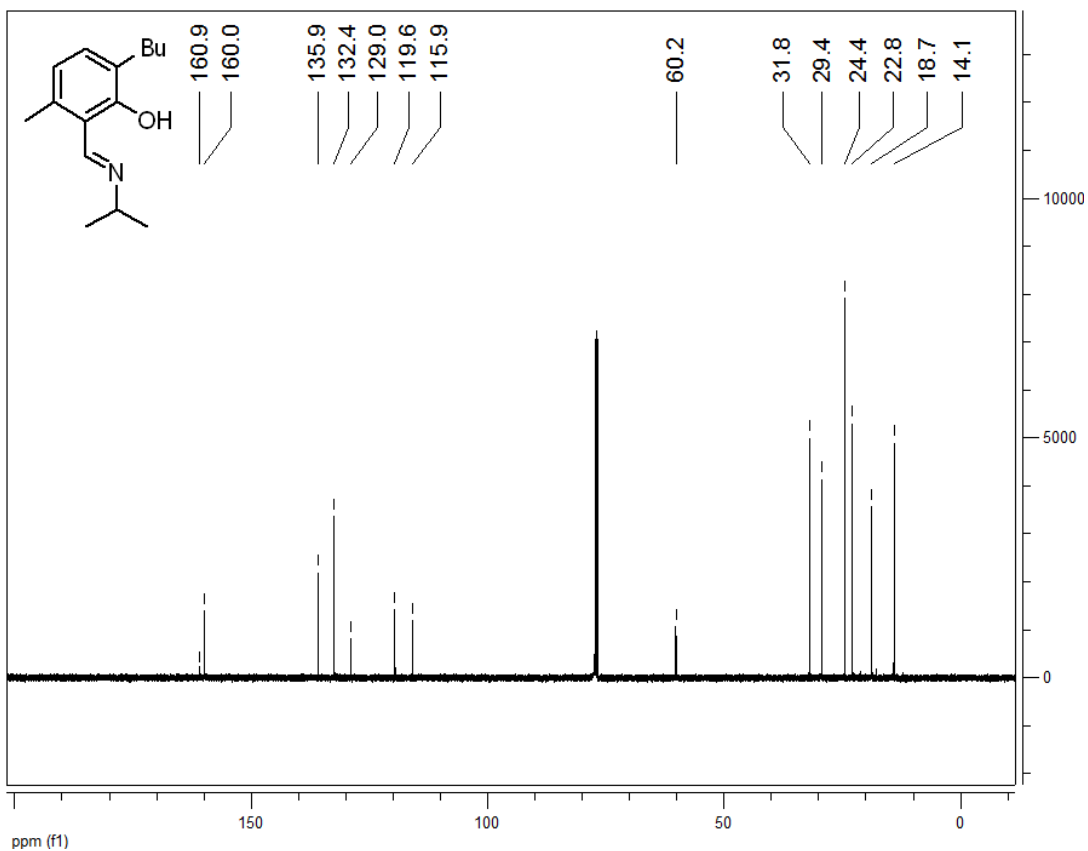

# Phenol 14

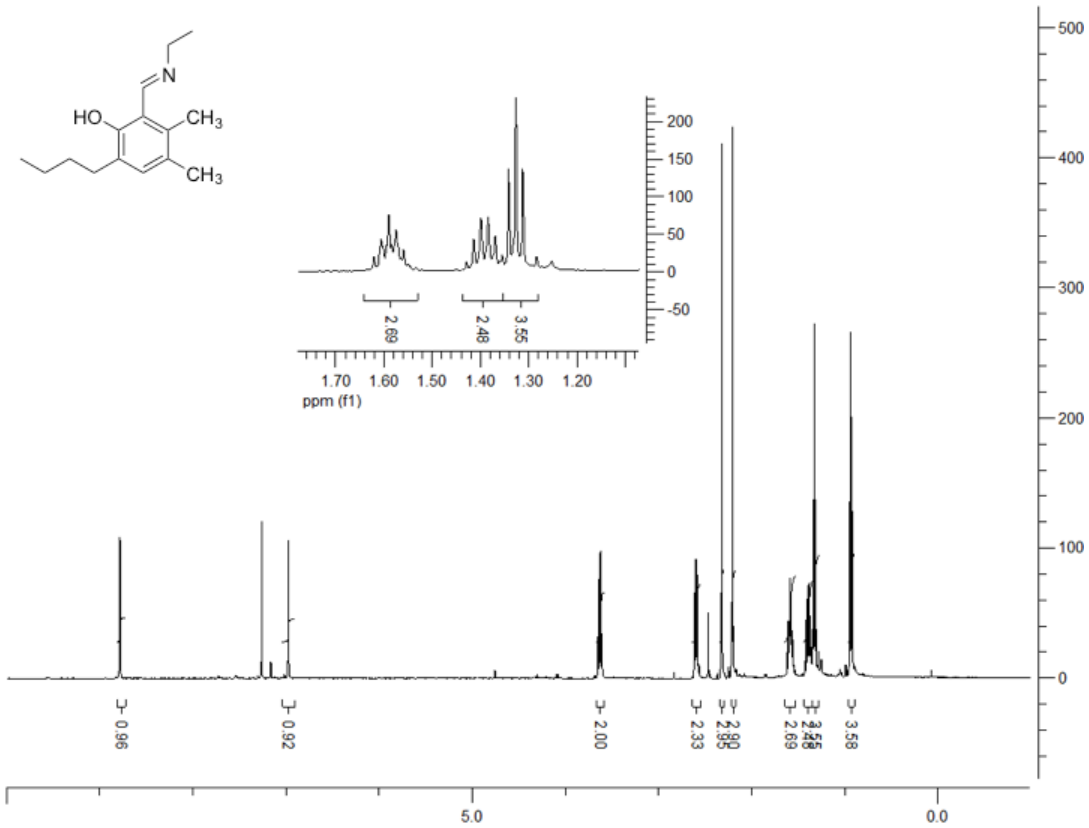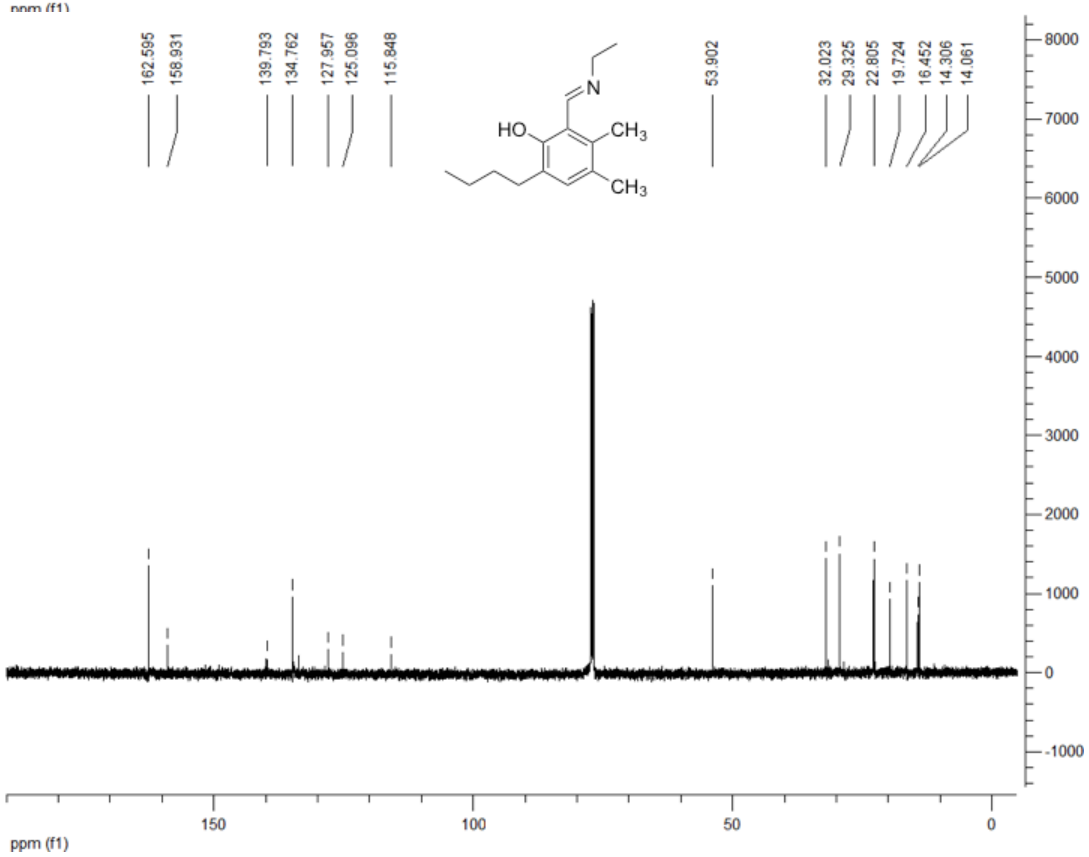



# Naphthol 18

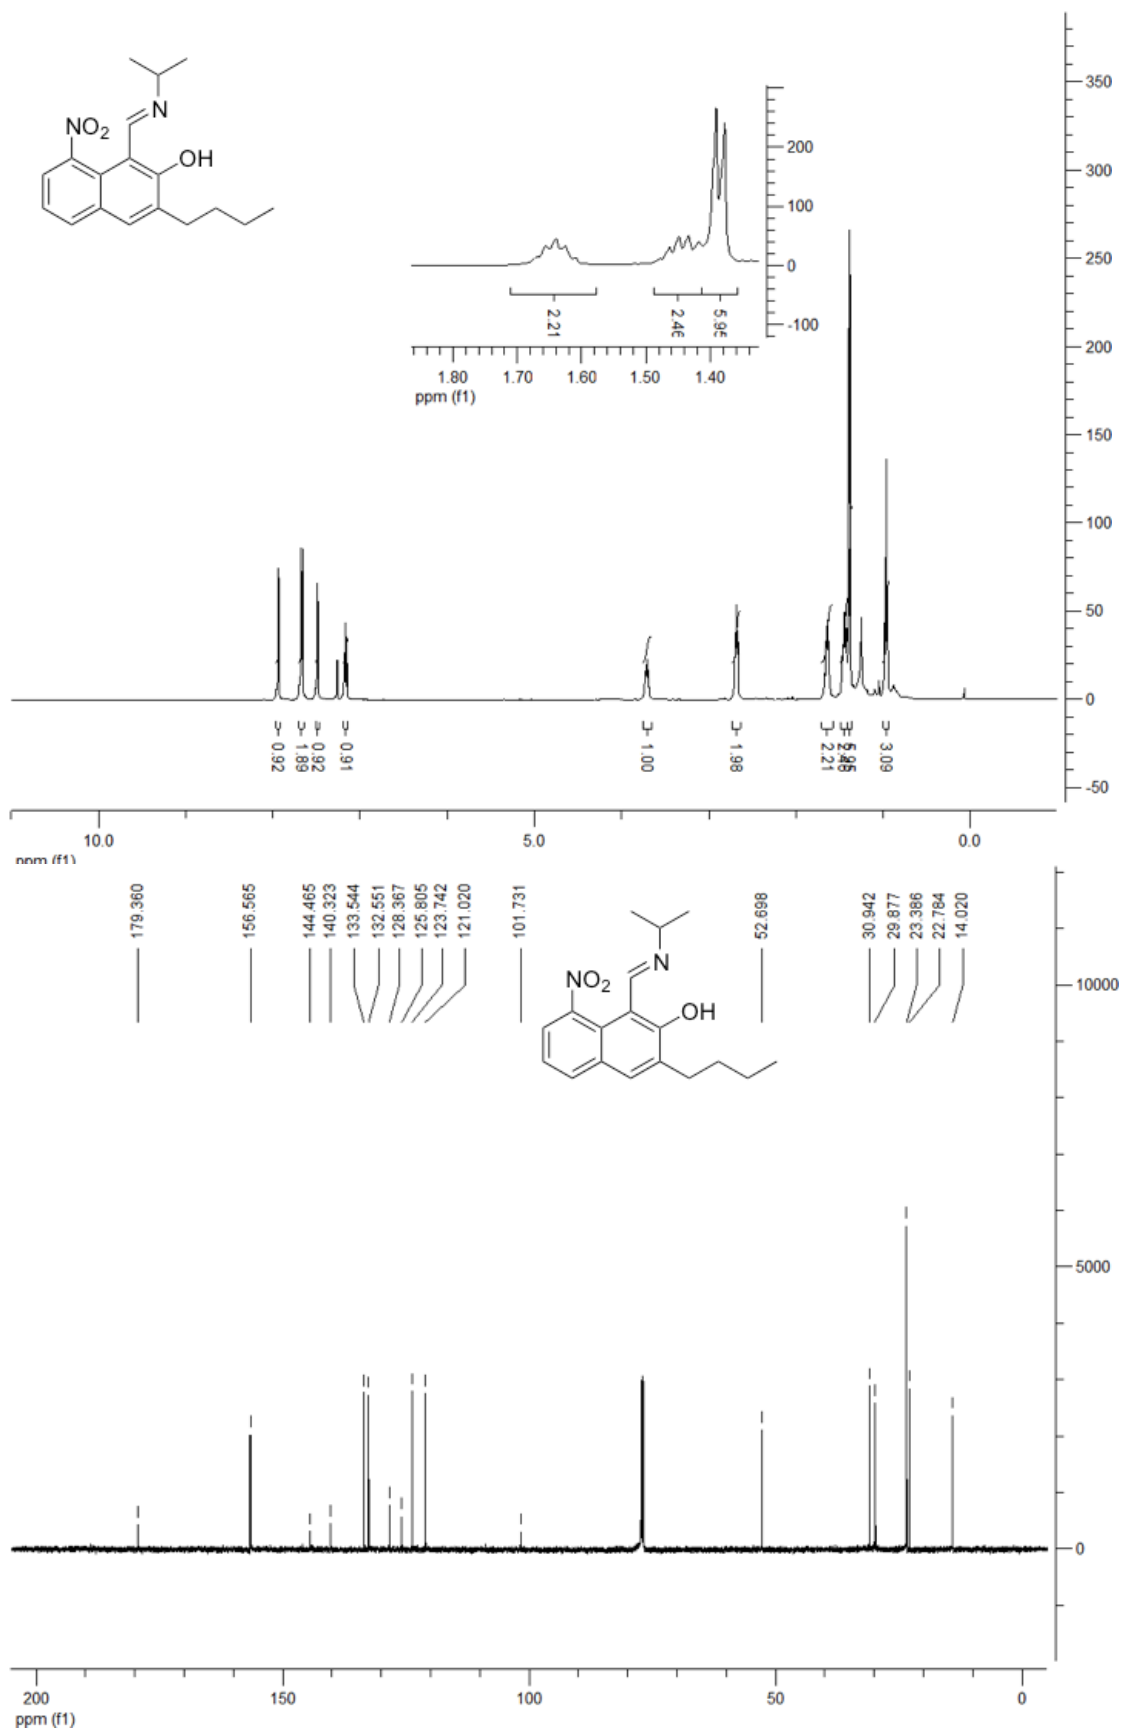

# Naphthol 20

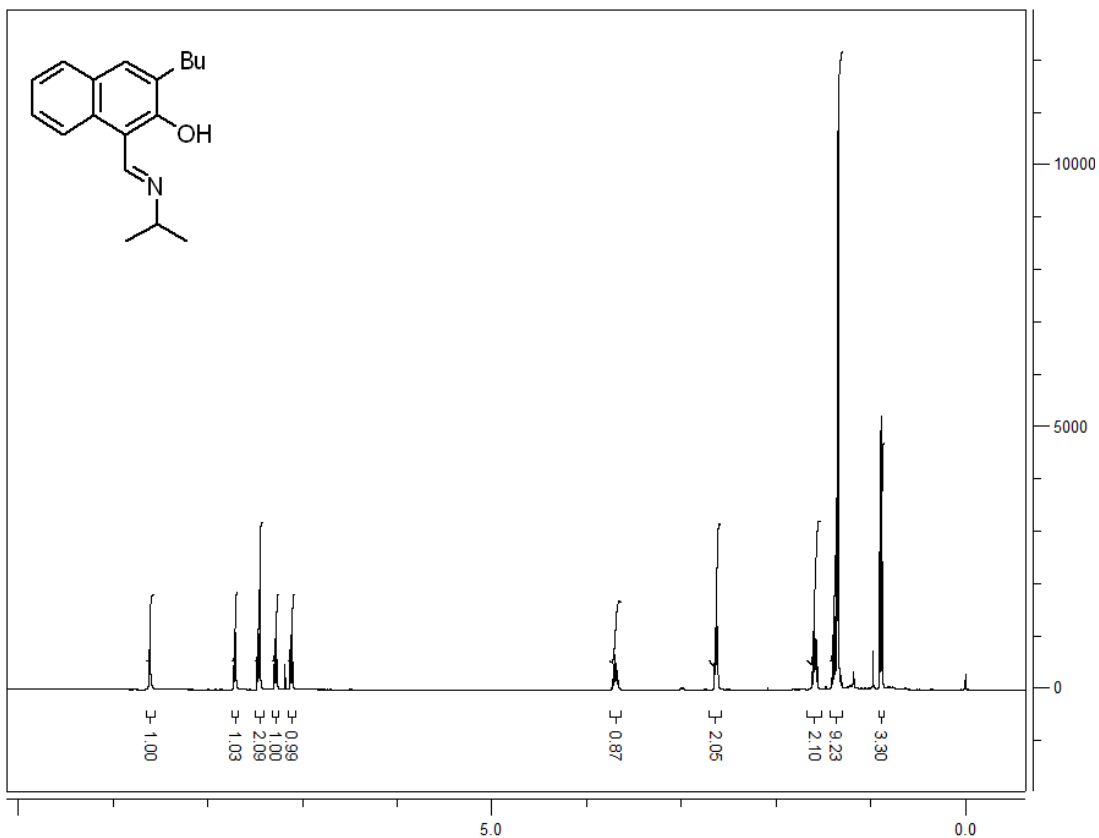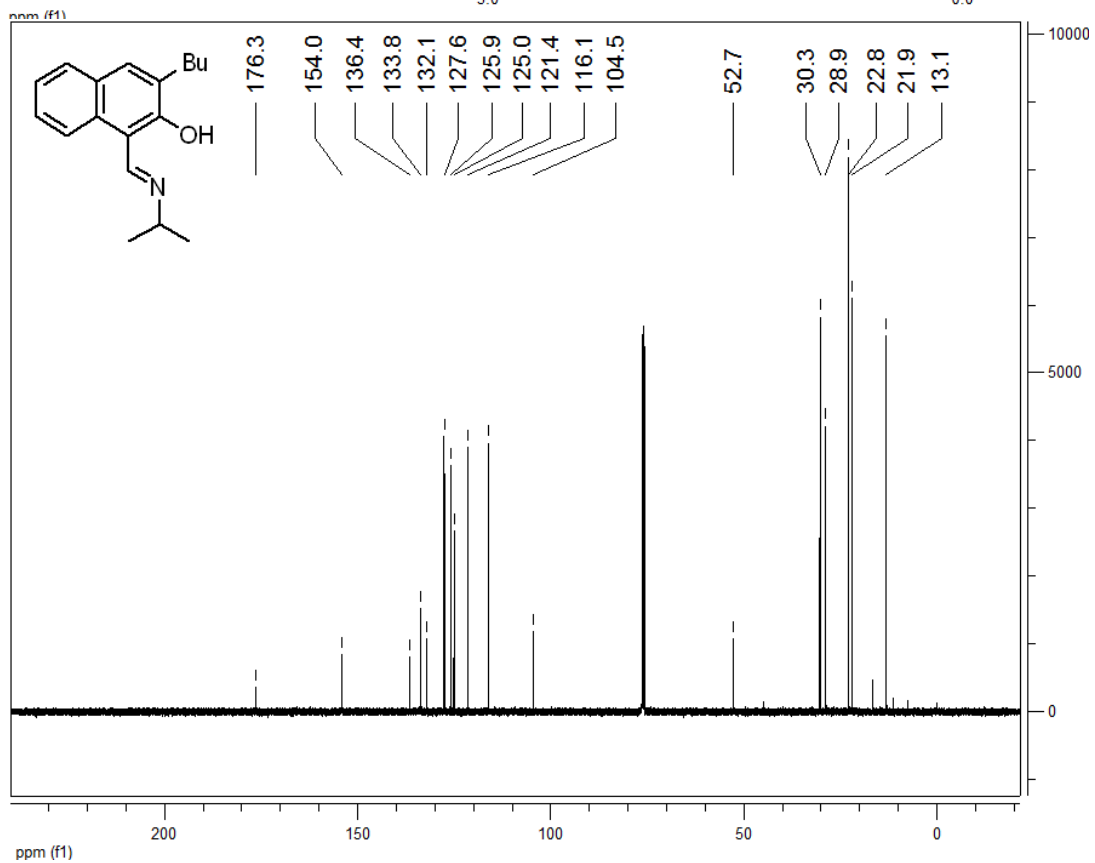



# Naphthol 22

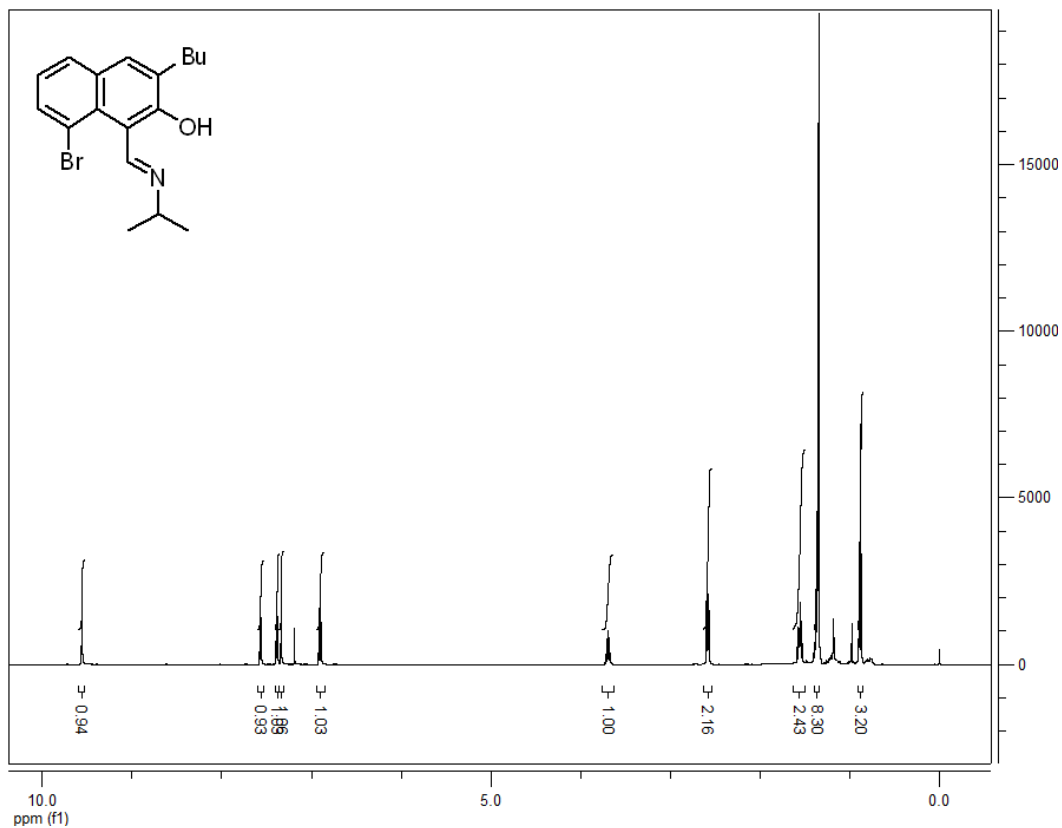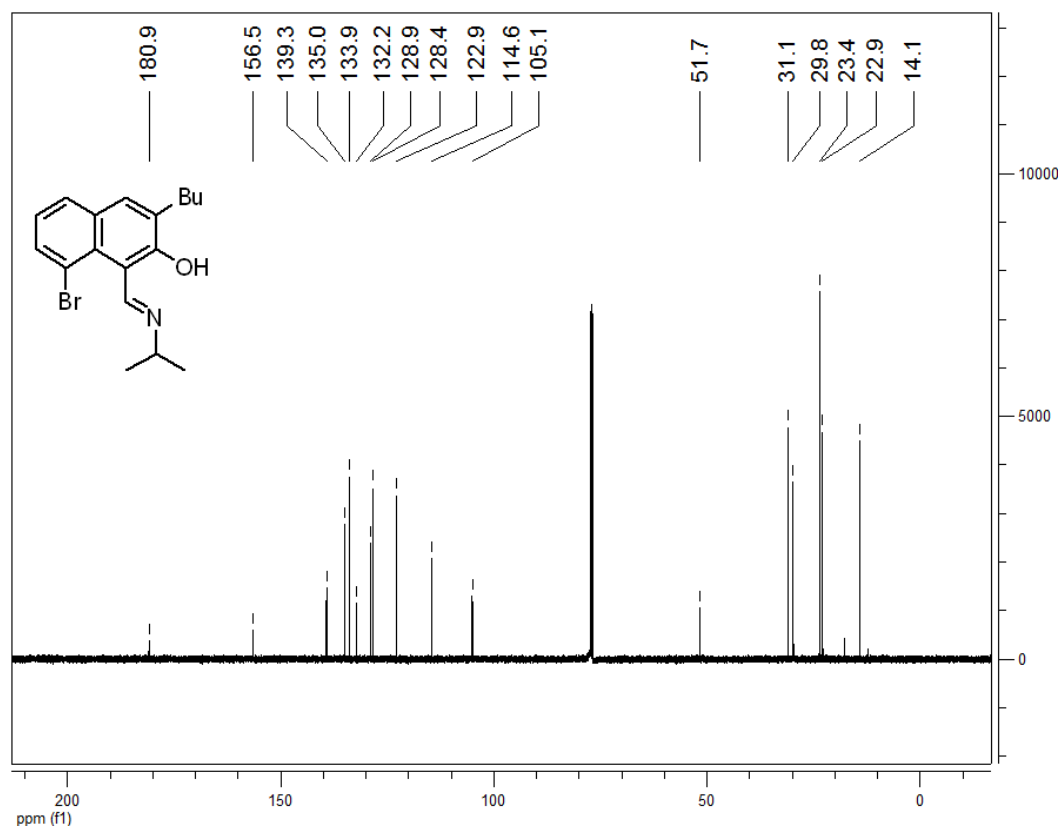

# Naphthol 24

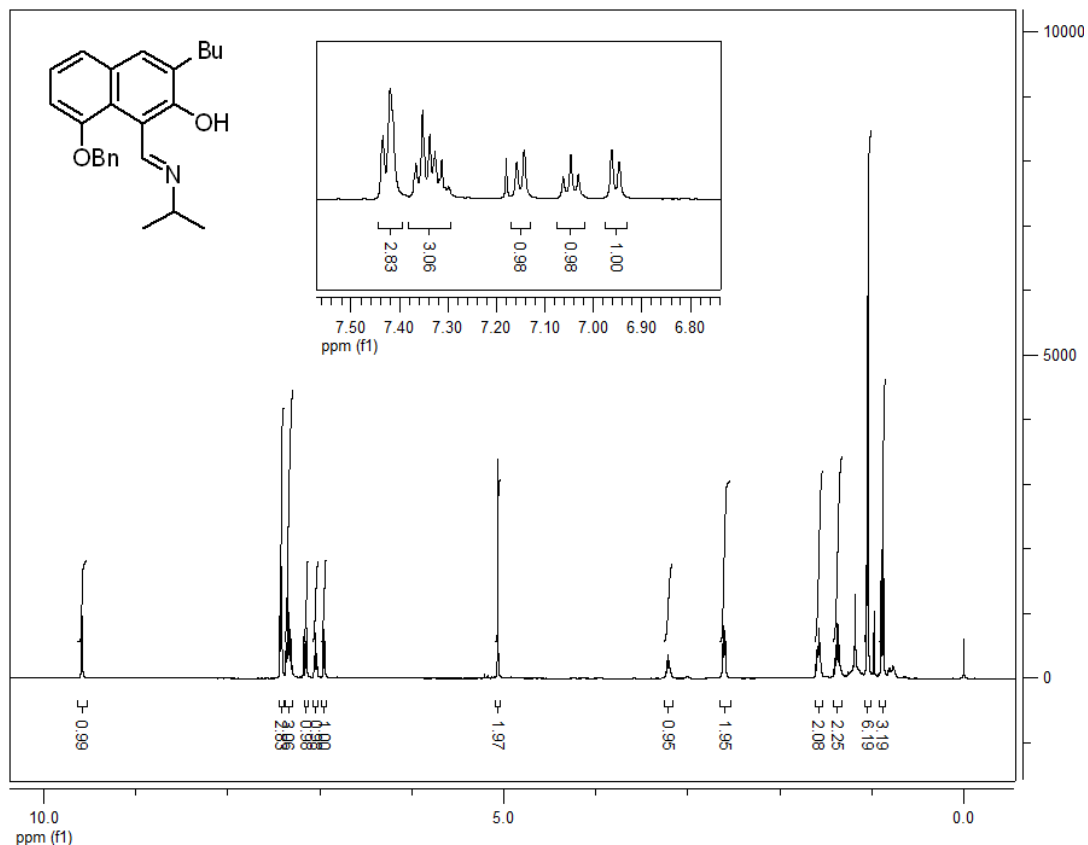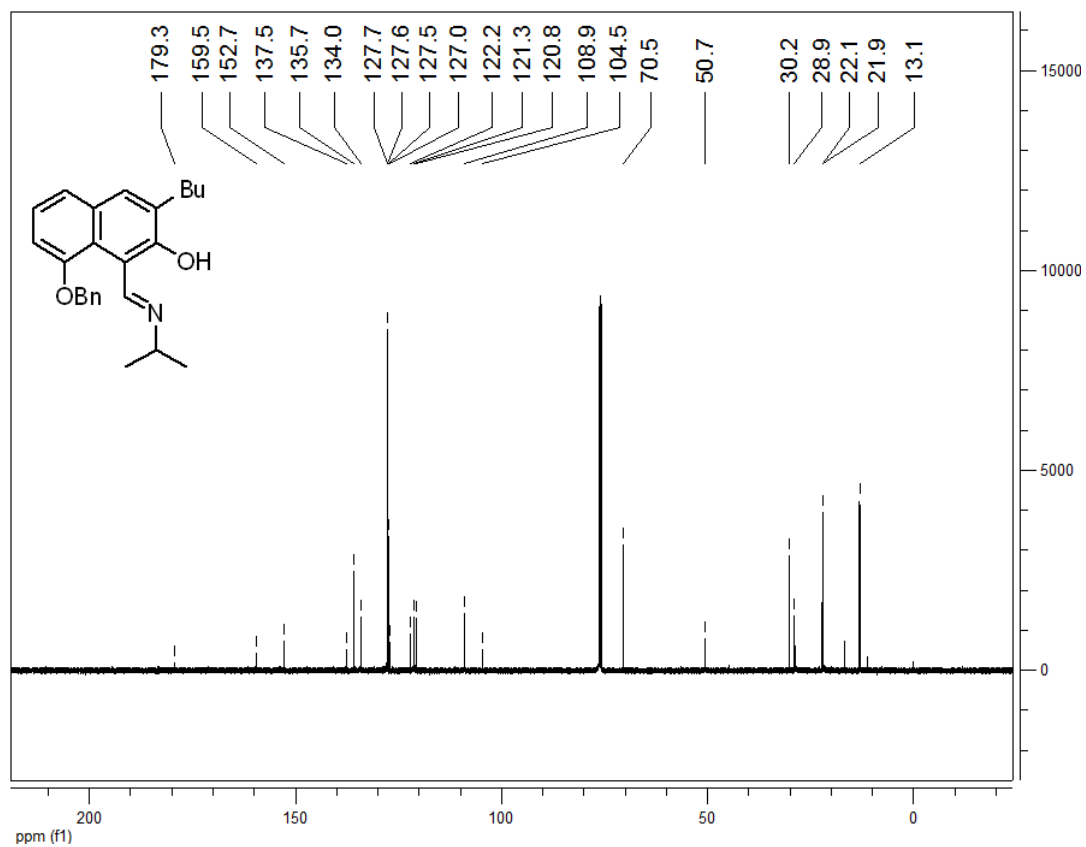

# Naphthol 25

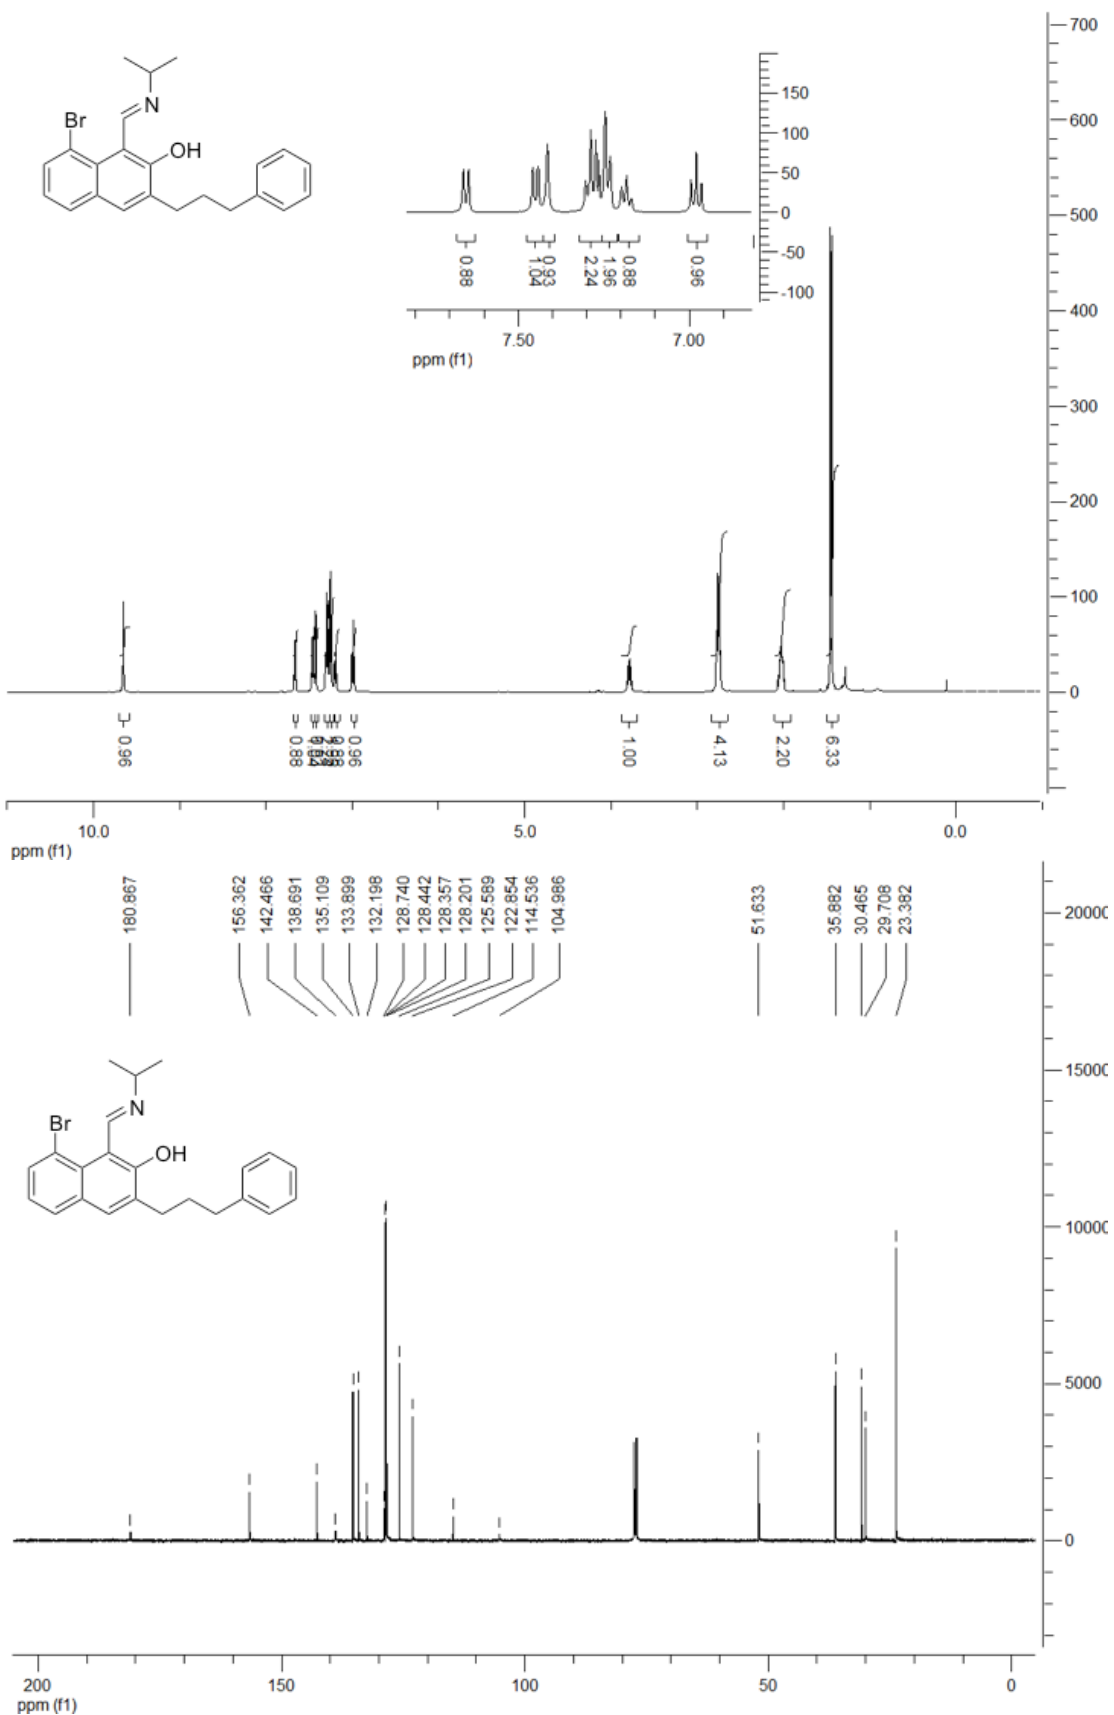

# Naphthol 26

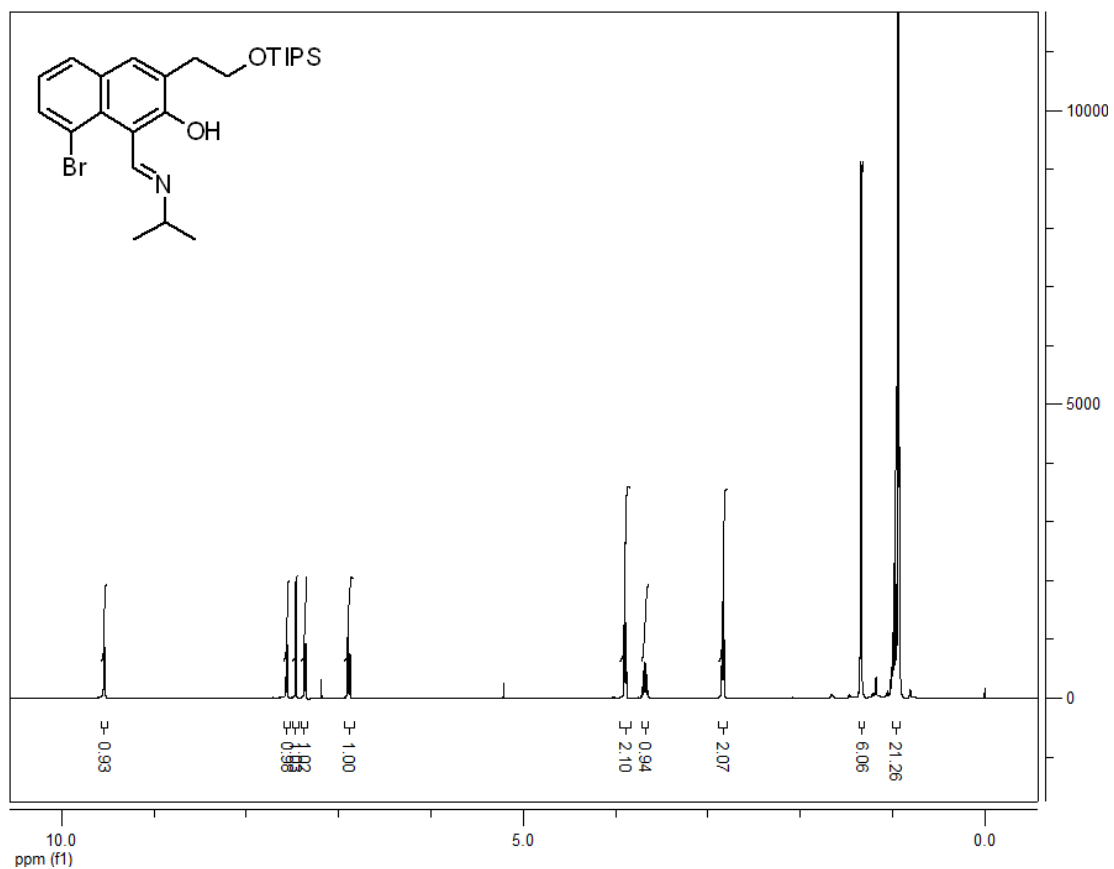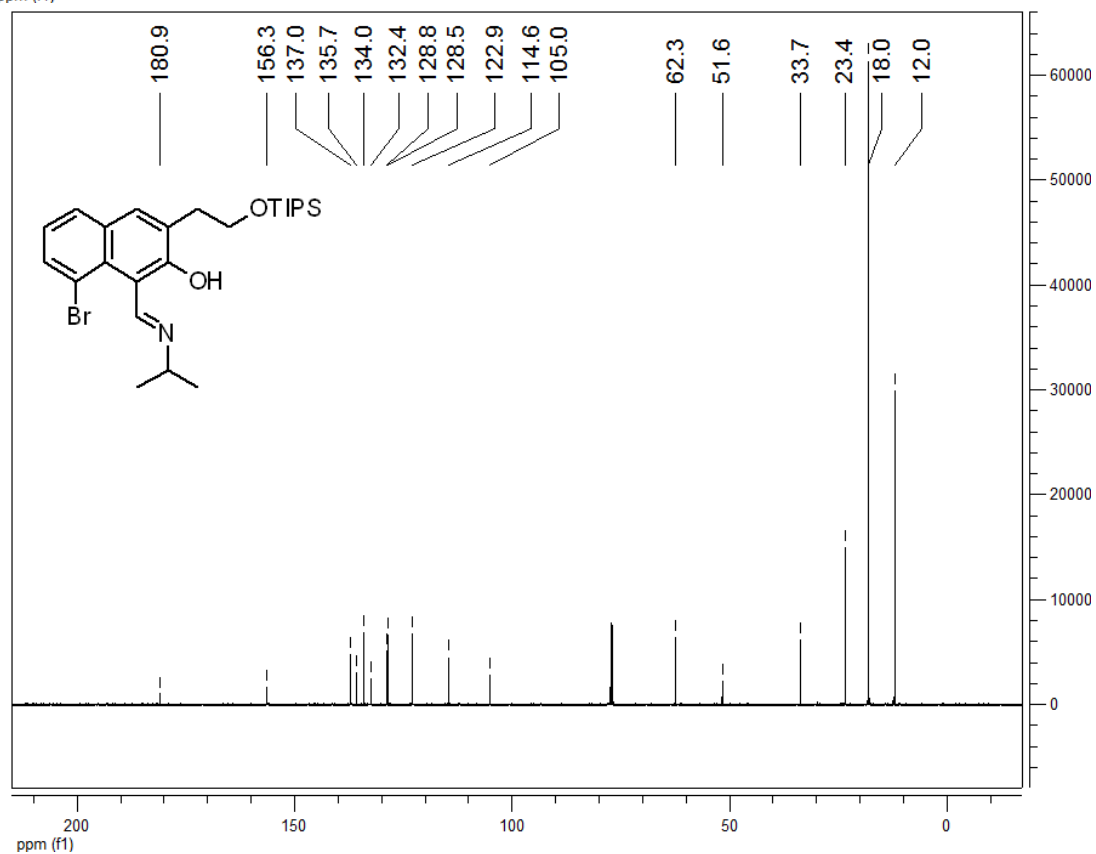

# Naphthol 27

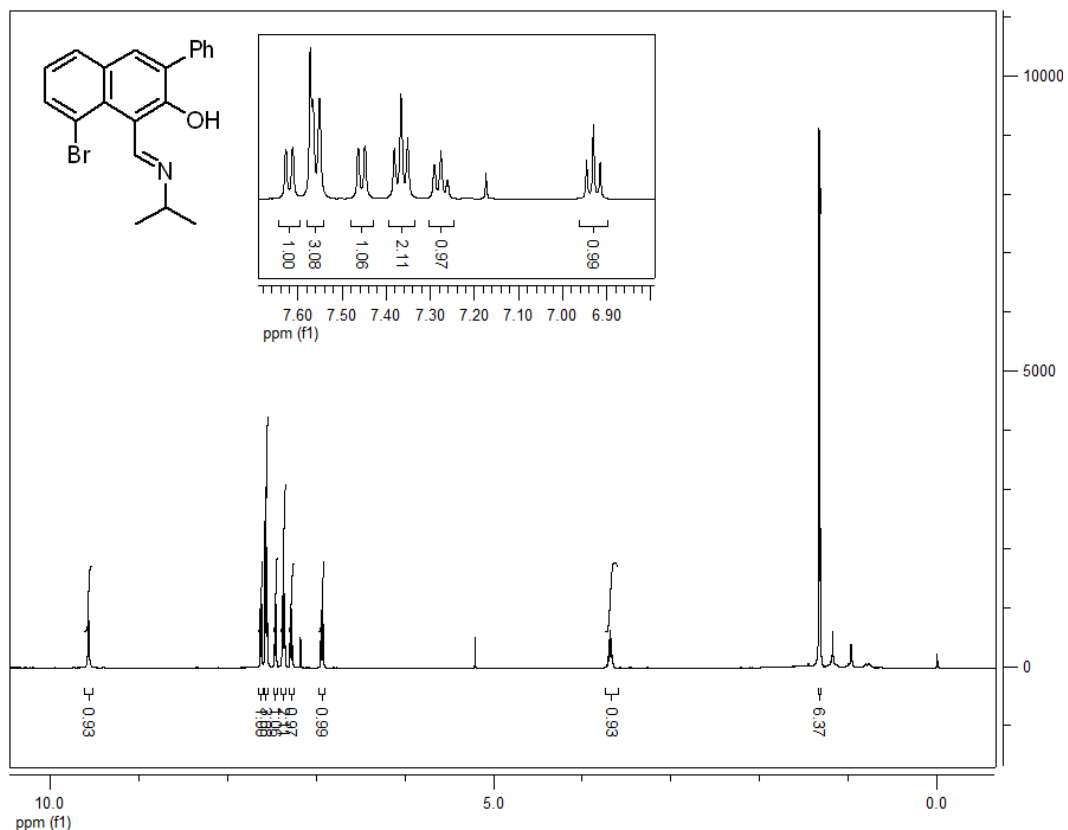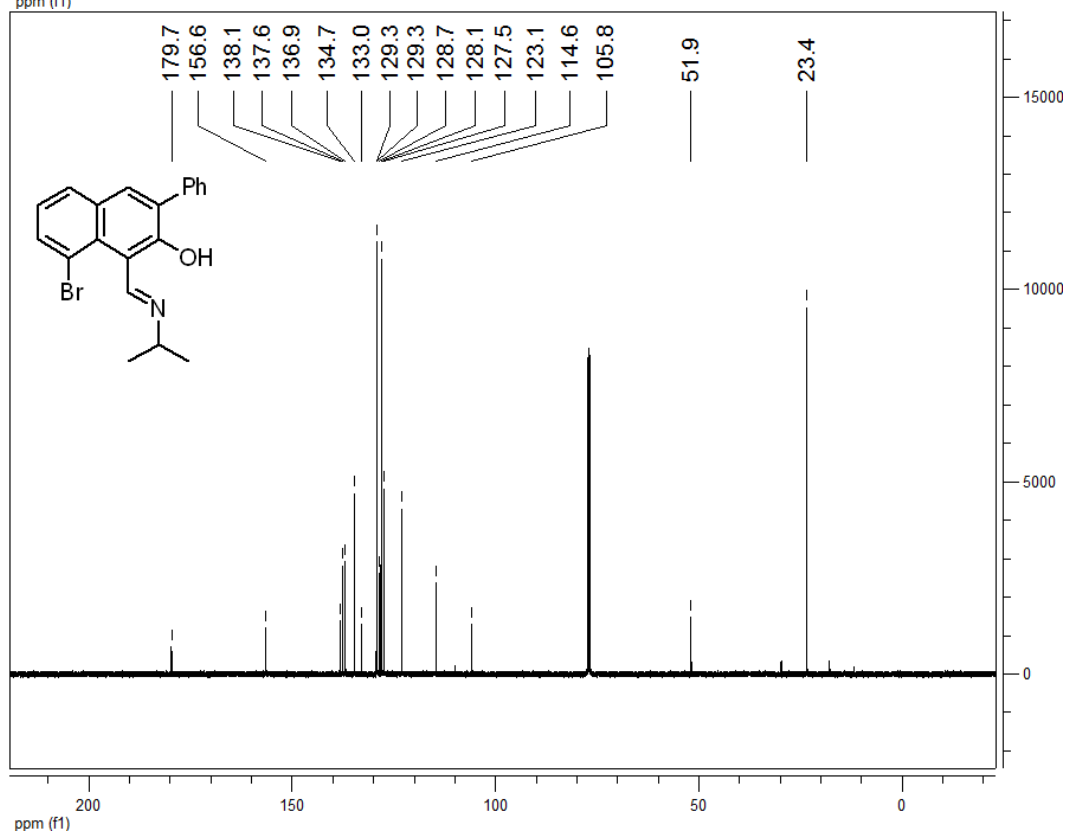

# Naphthol 28

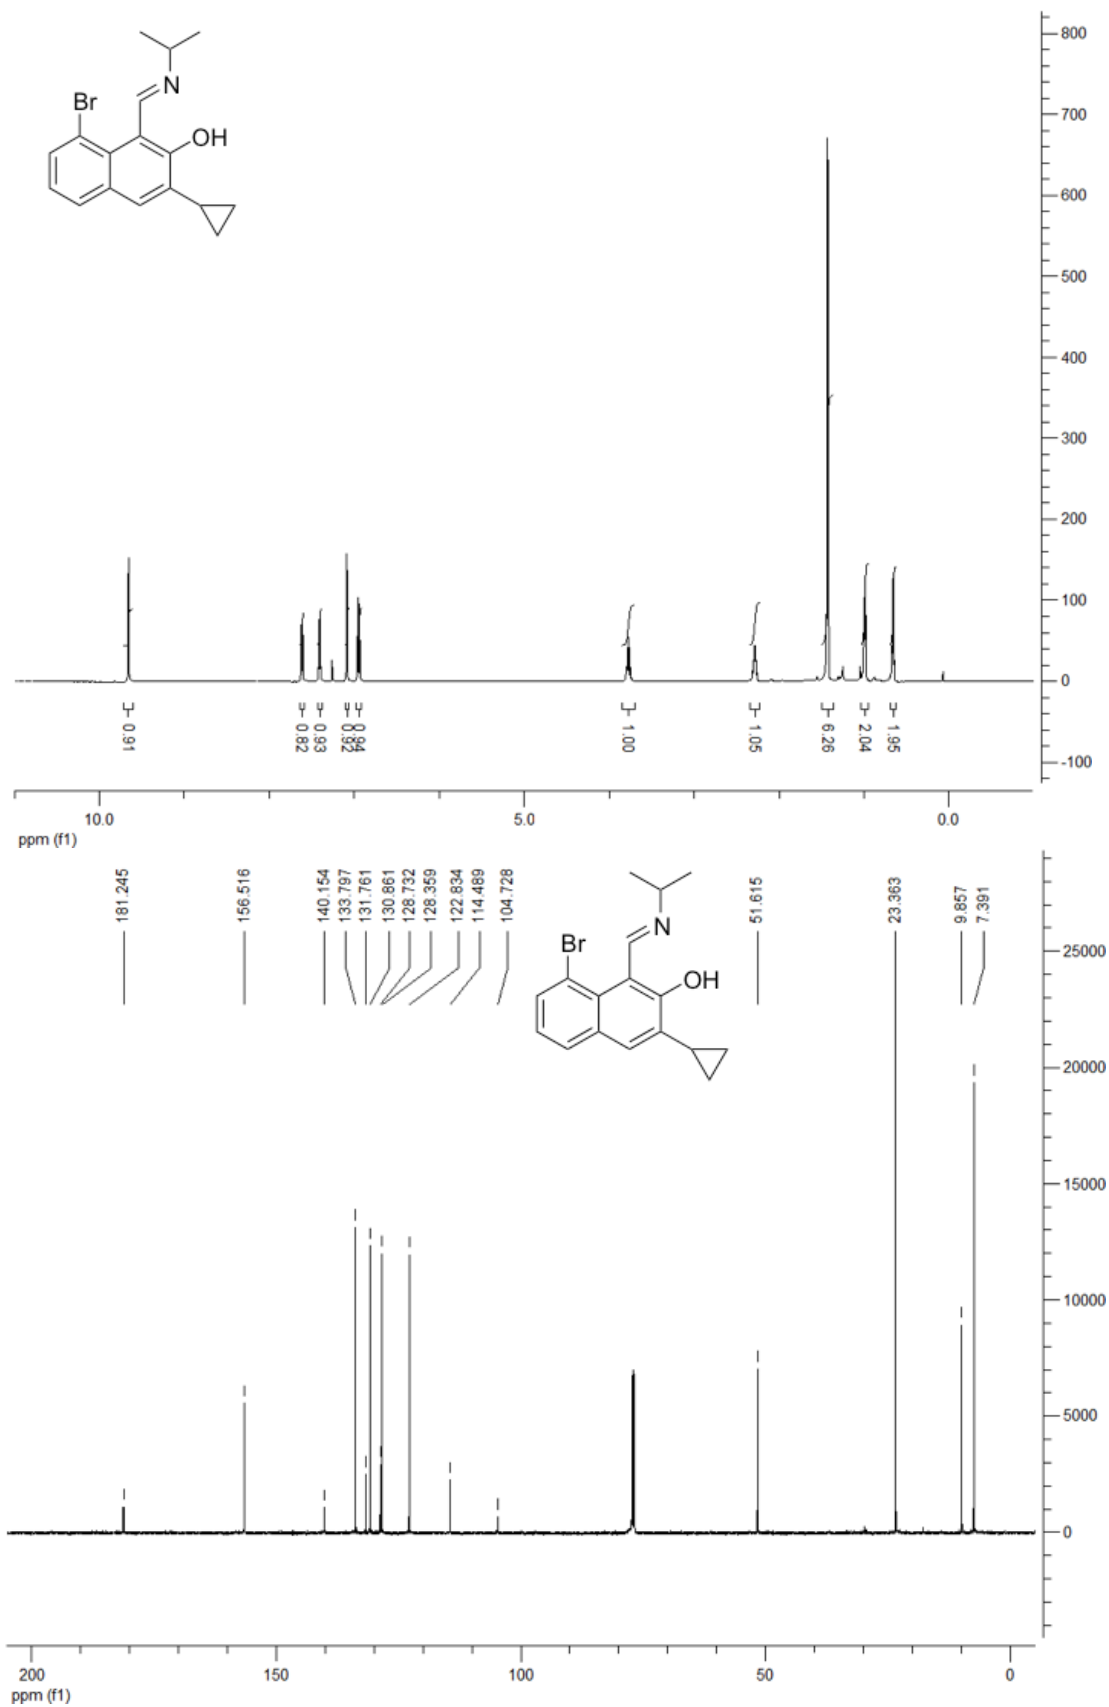

# Naphthol 29

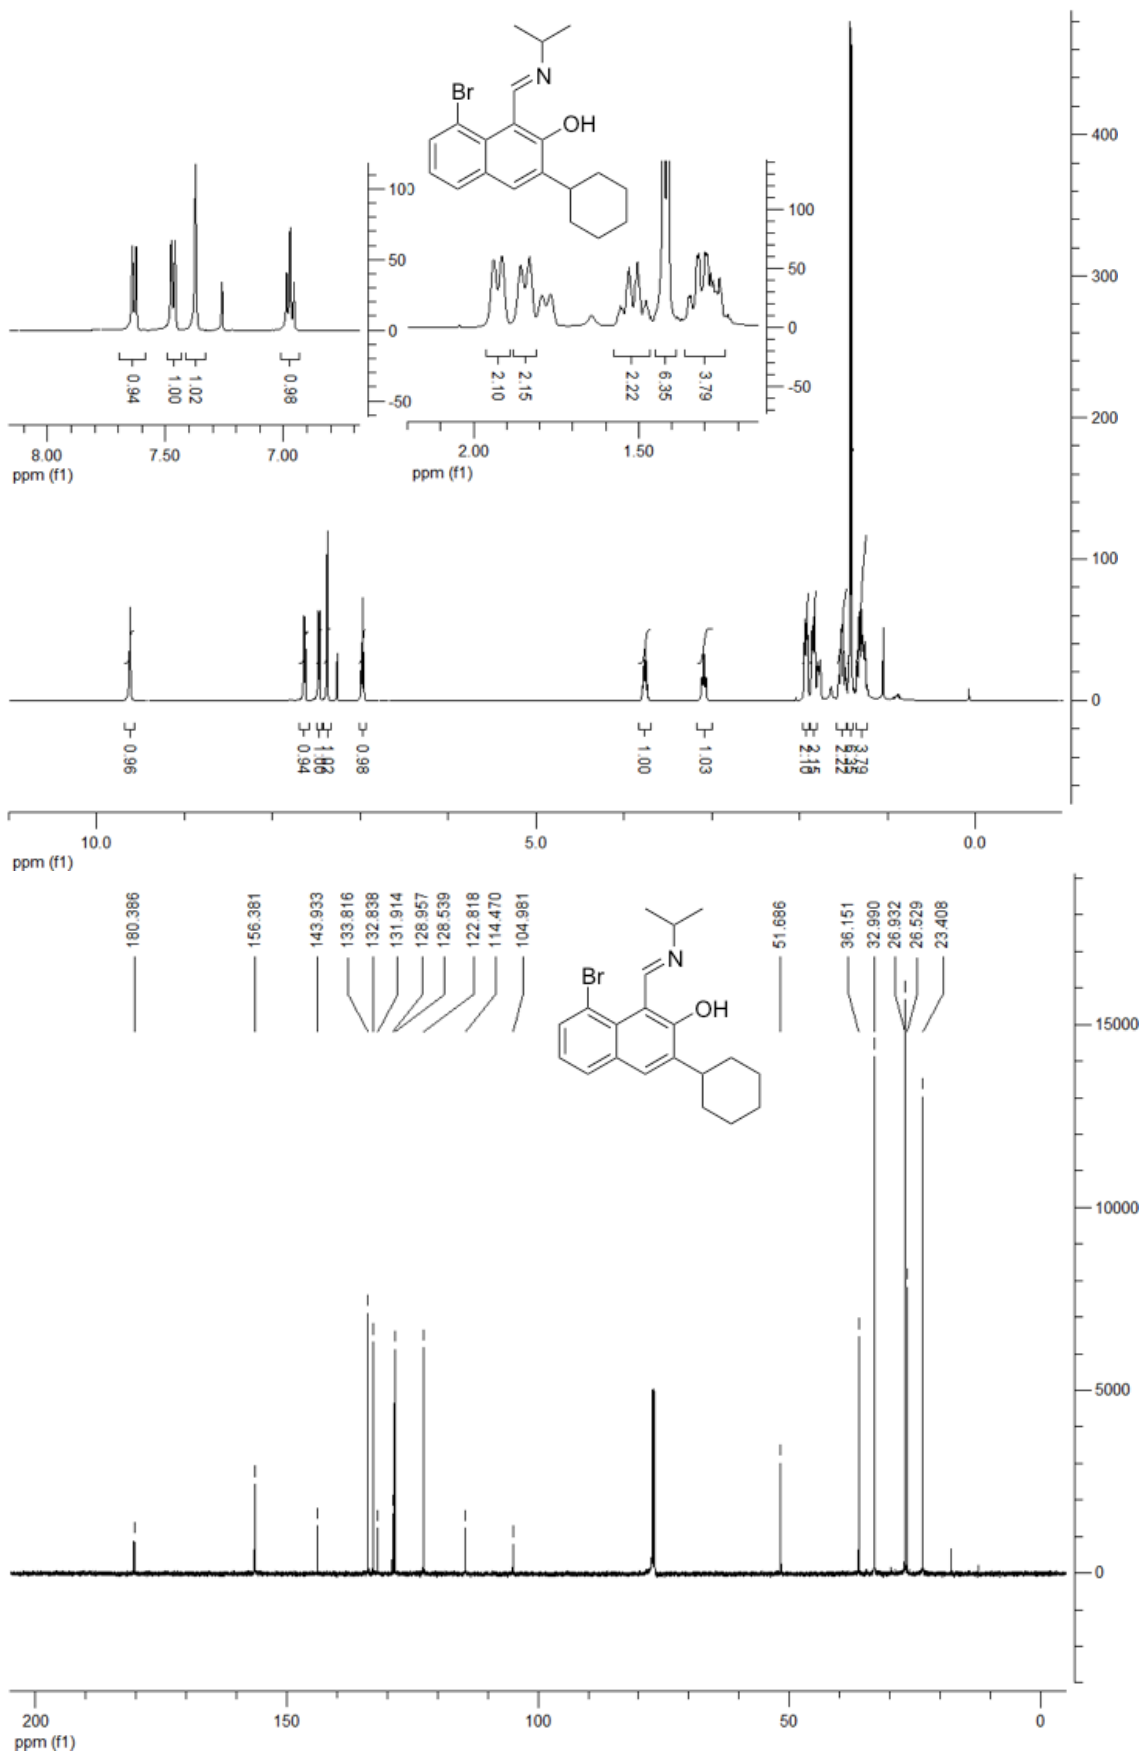

# Naphthol 30

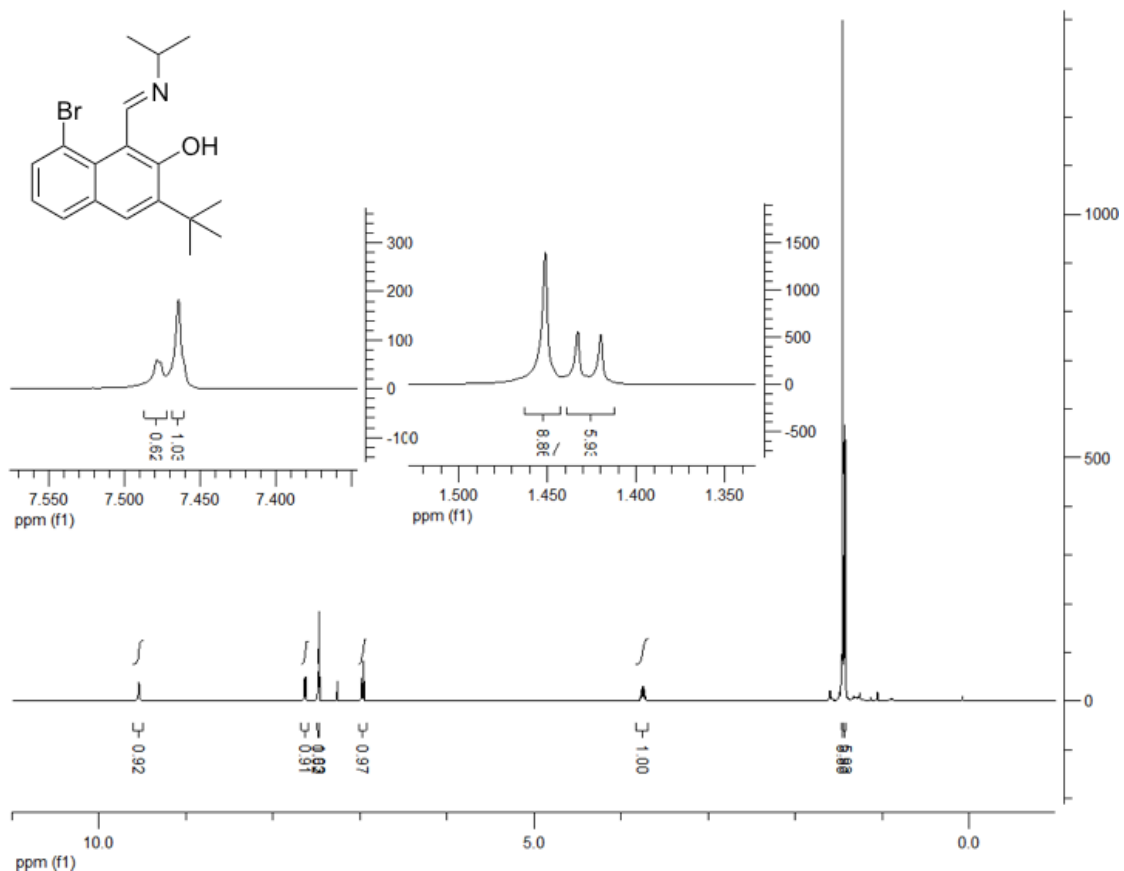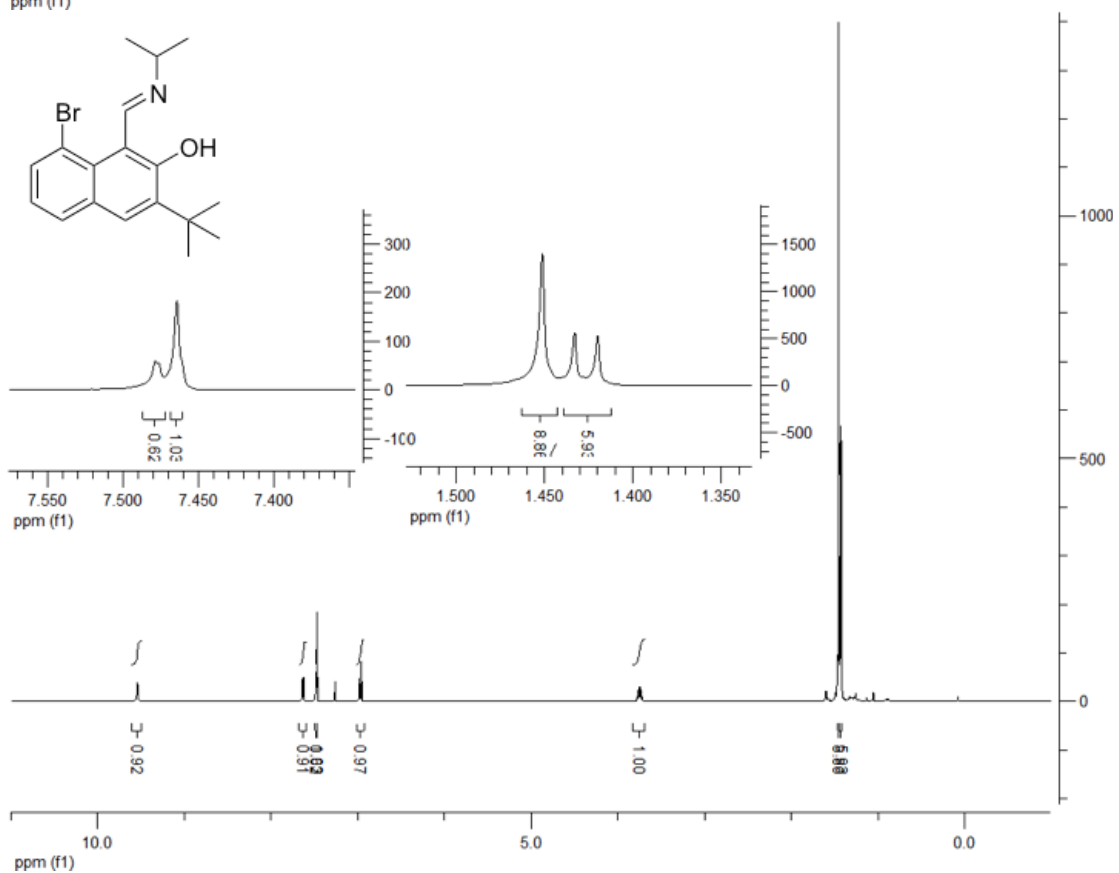

Supplement: NIHMS535411-supplement-Supporting_Information.pdf [file NIHMS535411-supplement-Supporting_Information.pdf]
